# Supplementary material for: A Randomized Controlled Trial Assessing Infectious Disease Risks from Bathing in Fresh Recreational Waters in Relation to the Concentration of Escherichia coli, Intestinal Enterococci, Clostridium perfringens, and Somatic Coliphages
Source: PubMed Central journal article supplement (PMC1367836; doi:10.1289/ehp.8115), 2005-09-29
Supplement: ehp0114-000228s1.pdf [file ehp0114-000228s1.pdf]

**Wiedenmann A. et al.:** Health risks from freshwater bathing

**Supplemental Data, Annex 1.** Geographical site characteristics and sources of fecal contamination

| <b>Site</b> | <b>Geographical characteristics</b>                                                                                                                                                                       | <b>Probable or possible sources of fecal contamination</b>                                                                                                                                                                                                                                         |
|-------------|-----------------------------------------------------------------------------------------------------------------------------------------------------------------------------------------------------------|----------------------------------------------------------------------------------------------------------------------------------------------------------------------------------------------------------------------------------------------------------------------------------------------------|
| 1           | Ground water lake, former gravel mining area,<br>in rural environment with adjacent conservation areas<br>(Southwest of Germany, Baden-Württemberg)                                                       | Sparse natural populations of water fowl,<br>mainly swans, ducks and great crested grebes,<br>accidental fecal release from bathers                                                                                                                                                                |
| 2           | Germany's biggest natural inland lake<br>in urban environment<br>with the Rhine River running through<br>and many smaller rivers and streams running into it<br>(Southwest of Germany, Baden-Württemberg) | Discharge from tertiary treated sewage,<br>sporadic sewage treatment plant and<br>combined sewer overflows,<br>sporadic agricultural run-off,<br>illegal discharge from boats,<br>urban and natural populations of water fowl,<br>mainly ducks and coots,<br>accidental fecal release from bathers |
| 3           | Ground water lake in urban environment<br>(Northeast of Germany, Berlin)                                                                                                                                  | Urban and natural populations of water fowl,<br>mainly ducks and grey herons,<br>accidental fecal release from bathers                                                                                                                                                                             |
| 4           | Blind arm of a stream in urban environment<br>(North of Germany, Schleswig-Holstein)                                                                                                                      | Combined sewer overflows and urban run-off<br>after a heavy rain fall the day before,<br>urban and natural populations of water fowl<br>mainly ducks, gulls and swans,<br>accidental fecal release from bathers                                                                                    |
| 5           | Ground water lake in urban environment<br>(Southeast of Germany, Bavaria)                                                                                                                                 | High overpopulation with ducks, geese and gulls,<br>accidental fecal release from bathers                                                                                                                                                                                                          |

**Supplemental Data, Annex 2.** Median concentrations and concentration ranges of the microbiological parameters.

| Parameter                      | Median concentration<br>(MO/100ml) | Range<br>[ LL; UL ]        | Water samples<br>n | Method                    |
|--------------------------------|------------------------------------|----------------------------|--------------------|---------------------------|
| <i>Escherichia coli</i>        | 136                                | [ 4.7; 5344 ] <sup>a</sup> | 421                | ISO 9308-3 <sup>b</sup>   |
| Intestinal enterococci         | 37                                 | [ 3.0; 1504 ] <sup>a</sup> | 421                | ISO 7899-1 <sup>c</sup>   |
| <i>Clostridium perfringens</i> | 18                                 | [ 9; 260 ] <sup>a</sup>    | 423                | CEU 1998 <sup>d</sup>     |
| Somatic coliphages             | 20                                 | [ 10; 3780 ] <sup>a</sup>  | 420                | ISO 10705-2 <sup>e</sup>  |
| Aeromonads                     | 8200                               | [ 600; 31400 ]             | 420                | Schulze 1996 <sup>f</sup> |
| <i>Pseudomonas aeruginosa</i>  | 10                                 | [ 10; 100 ] <sup>a</sup>   | 385                | DIN EN 12780 <sup>g</sup> |

Abbreviations: MO/100mL, microorganisms per 100 mL; n, number; LL, lower limit; UL, upper limit. <sup>a</sup>LL is also the lower method detection limit. <sup>b</sup>MUG hydrolysis, microtiter plate method, 3 plates per sample, 200 µl per well, 192 wells with a 1:2 dilution, 96 wells with a 1:10 dilution. <sup>c</sup>MUD hydrolysis and formazan formation, 3 plates per sample, 200 µl per well, 288 wells with a 1:2 dilution. <sup>d</sup>Membrane filtration, 10 mL and 1 mL on m-CP agar. <sup>e</sup>Double agar layer method, 10 x 1 ml, sample pre-filtration with beef-extract-saturated 0.45 µm membrane filters. <sup>f</sup>Membrane filtration, 10 mL and 1 mL on ampicillin-dextrine agar. <sup>g</sup>Membrane filtration, 10 mL on cetrinide agar, only pyocyanine-positive colonies were counted .

**Wiedenmann A. et al.:** Health risks from freshwater bathing

**Supplemental Data, Annex 3.** Correlation between microbiological parameters, sorted by correlation coefficient, after exclusion of censored values i. e. values below detection limit.

| Parameter X                    | Parameter Y                    | n   | Intercept <sup>a</sup> | Slope <sup>b</sup> | Correlation coefficient |
|--------------------------------|--------------------------------|-----|------------------------|--------------------|-------------------------|
| <i>Escherichia coli</i>        | Inestinal enterococci          | 391 | -0.270                 | 0.836              | 0.79                    |
| <i>Escherichia coli</i>        | Somatic coliphages             | 243 | -1.112                 | 1.243              | 0.78                    |
| <i>Escherichia coli</i>        | <i>Clostridium perfringens</i> | 285 | -0.907                 | 0.537              | 0.57                    |
| Inestinal enterococci          | <i>Clostridium perfringens</i> | 278 | -0.714                 | 0.631              | 0.51                    |
| <i>Clostridium perfringens</i> | Somatic coliphages             | 209 | 1.137                  | 2.115              | 0.50                    |
| Inestinal enterococci          | Somatic coliphages             | 241 | -0.802                 | 1.525              | 0.41                    |
| Inestinal enterococci          | <i>Pseudomonas aeruginosa</i>  | 50  | -1.370                 | 0.841              | 0.31                    |
| <i>Escherichia coli</i>        | <i>Pseudomonas aeruginosa</i>  | 50  | -1.685                 | 0.640              | 0.29                    |
| Somatic coliphages             | <i>Pseudomonas aeruginosa</i>  | 49  | -1.099                 | 0.483              | 0.28                    |
| <i>Escherichia coli</i>        | Aeromonads                     | 405 | 2.779                  | 0.492              | 0.27                    |
| Somatic coliphages             | Aeromonads                     | 242 | 2.760                  | 0.529              | 0.24                    |
| <i>Clostridium perfringens</i> | Aeromonads                     | 285 | 3.473                  | 1.030              | 0.23                    |
| <i>Clostridium perfringens</i> | <i>Pseudomonas aeruginosa</i>  | 47  | -0.252                 | 0.795              | 0.17                    |
| Inestinal enterococci          | Aeromonads                     | 399 | 2.871                  | 0.617              | 0.11                    |
| Aeromonads                     | <i>Pseudomonas aeruginosa</i>  | 48  | -4.789                 | 1.211              | 0.07                    |

Abbreviations: n, Number of water samples.

<sup>a</sup> Intercept in the orthogonal fit line equation:  $\log_{10}(\text{parameter Y}) = \text{intercept} + \text{slope} \times \log_{10}(\text{parameter X})$ .

<sup>b</sup> slope of the orthogonal fit line

**Wiedenmann A. et al.:** Health risks from freshwater bathing

**Supplemental Data, Annex 4.** Crude incidence rates, attributable risks and relative risks of bathers vs. non-bathers one and three weeks after exposure.

| Disease  | Non-bathers                     |      |      |      | Bathers            |      |     |     | Bathers vs. non-bathers |       |                 |      |                 |     |     |     |
|----------|---------------------------------|------|------|------|--------------------|------|-----|-----|-------------------------|-------|-----------------|------|-----------------|-----|-----|-----|
|          | Incidence rate (%) <sup>a</sup> |      | n    |      | Incidence rate (%) |      | n   |     | p-Value <sup>b</sup>    |       | aR <sup>c</sup> |      | RR <sup>d</sup> |     |     |     |
|          | 1 w                             | 3 w  | 1 w  | 3 w  | 1 w                | 3 w  | 1 w | 3 w | 1 w                     | 3 w   | 1 w             | 3 w  | 1 w             | 3 w |     |     |
| AFRI     | 1.1                             | 2.2  | 810  | 802  | 0.9                | 1.7  | 759 | 747 | 0.71                    | 0.48  | -0.2            | -0.5 | 0.8             | 0.8 |     |     |
| CC       | 13.6                            | 20.4 | 804  | 793  | 15.4               | 23.1 | 754 | 741 | 0.31                    | 0.21  | 1.8             | 2.6  | 1.1             | 1.1 |     |     |
| EAR-I    | 0.7                             | 1.3  | 1003 | 1001 | 1.6                | 2.2  | 950 | 942 | 0.065                   | 0.12  | 0.9             | 0.9  | 2.3             | 1.7 |     |     |
| EYE-I    | 1.6                             | 2.5  | 999  | 997  | 1.7                | 2.7  | 944 | 938 | 0.87                    | 0.83  | 0.1             | 0.2  | 1.1             | 1.1 |     |     |
| GE_UK    | 1.4                             | 4.8  | 920  | 902  | 3.3                | 6.6  | 837 | 818 | 0.0074                  | **    | 0.10            | 1.9  | 1.8             | 2.4 | 1.4 |     |
| GE_UK-wf | 2.8                             | 7.1  | 921  | 907  | 5.4                | 9.0  | 847 | 831 | 0.0056                  | **    | 0.13            | 2.6  | 2.0             | 1.9 | 1.3 |     |
| GE_NL-2  | 5.2                             | 11.1 | 921  | 908  | 7.4                | 13.0 | 846 | 823 | 0.053                   | (*)   | 0.23            | 2.2  | 1.9             | 1.4 | 1.2 |     |
| SKIN-I   | 2.8                             | 4.3  | 957  | 947  | 9.3                | 13.0 | 880 | 869 | <0.0001                 | ***   | <0.0001         | ***  | 6.5             | 8.7 | 3.3 | 3.0 |
| UTI      | 0.4                             | 1.1  | 1002 | 999  | 0.2                | 0.4  | 944 | 939 | 0.46                    | 0.090 | -0.2            | -0.7 | 0.5             | 0.4 |     |     |

Abbreviations: n, number of participants; aR, attributable risk; RR, relative risk; 1 w, within one week after exposure; 3 w, within three weeks after exposure; AFRI, acute febrile respiratory infections: (fever and sore throat, sphagitis) or (fever and pain in the chest) or (fever and dry cough) or (fever and productive cough) or (fever and breathing difficulties) or (fever and runny nose, coryza); CC, common cold: sore throat, sphagitis or dry cough or productive cough or runny nose, coryza; EAR-I, ear inflammation: inflammation, suppuration, pain in the ears; EYE-I, eye inflammation: inflammation, suppuration of the eyes, red painful eyes; GE\_UK, gastroenteritis definition UK: (diarrhoea and 3 or more bowel movements per day) or vomiting or (nausea and fever) or (indigestion and fever); GE\_UK-wf, gastroenteritis definition UK-wf: diarrhoea or vomiting or (nausea and fever) or (indigestion and fever); GE\_NL-2, gastroenteritis definition NL-2: diarrhoea or vomiting or nausea or stomach pains; SKIN-I, skin inflammation or cutaneous reactions: exanthema, skin eruption or skin irritation, itching; UTI: inflammation of the urinary bladder, urinary tract, urinary tract infection.

<sup>a</sup> Incidence rate (%) is the number of individuals with onset of disease within one or three weeks after exposure per 100 participants in the group of non-bathers or bathers. <sup>b</sup> p-Value in a Pearson's Chi Square test comparing the incidence rates of bathers and non-bathers. <sup>c</sup> Attributable risk is the incidence rate (%) of bathers minus the incidence rate (%) of non-bathers. <sup>d</sup> Relative risk is the incidence rate (%) of bathers divided by the incidence rate (%) of non-bathers. \* p-Value <0.05. \*\* p-Value <0.01. \*\*\* p-Value <0.001. (\*) borderline significance.

**Wiedenmann A. et al.:** Health risks from freshwater bathing

**Supplemental Data, Annex 5.** Univariate screening for potential confounding variables

| <b>Variables</b>             |                                                                                                                                                                                   | <b>Disease definitions</b> |    |       |      |      |
|------------------------------|-----------------------------------------------------------------------------------------------------------------------------------------------------------------------------------|----------------------------|----|-------|------|------|
| CODE <sup>a</sup>            | Explanation (result categories)                                                                                                                                                   | CC                         | UK | UK-wf | NL-2 | SKIN |
| <b>Ambient conditions</b>    |                                                                                                                                                                                   |                            |    |       |      |      |
| LOCATION                     | Study location (1, 2, 3, 4, 5)                                                                                                                                                    | *                          | *  | -     | -    | *    |
| WEATHER_TEMP                 | Weather conditions (cool or warm)                                                                                                                                                 | *                          | -  | -     | -    | *    |
| <b>Interviewer effect</b>    |                                                                                                                                                                                   |                            |    |       |      |      |
| INR3                         | Number of the interviewer in the 3rd interview (number)                                                                                                                           | -                          | -  | -     | -    | -    |
| <b>Age</b>                   |                                                                                                                                                                                   |                            |    |       |      |      |
| AGE                          | Age (in years)                                                                                                                                                                    | -                          | -  | -     | -    | -    |
| AGE-GROUP                    | Age (grouped by 10-years intervals)                                                                                                                                               | *                          | -  | -     | -    | -    |
| AGE-GROUP_2                  | Age (grouped by 10-year intervals and 60+)                                                                                                                                        | *                          | -  | -     | -    | -    |
| <b>Gender</b>                |                                                                                                                                                                                   |                            |    |       |      |      |
| SEX1                         | Gender (male or female)                                                                                                                                                           | -                          | -  | -     | -    | -    |
| <b>Socio-economic status</b> |                                                                                                                                                                                   |                            |    |       |      |      |
| DEGREE1                      | Degree<br>(none, primary school, non-classical secondary school, secondary school 12th class, secondary school 13th class, non-classical university, classical university, other) | *                          | -  | -     | -    | -    |
| DEGREE1_2                    | Degree<br>(none, primary school, non-classical secondary school, secondary school, university)                                                                                    | *                          | -  | -     | -    | *    |

**Wiedenmann A. et al.: Health risks from freshwater bathing**

**Supplemental Data, Annex 5. (continued)**

| <b>Variables</b>             |                                                                                               | <b>Disease definitions</b> |    |       |      |      |
|------------------------------|-----------------------------------------------------------------------------------------------|----------------------------|----|-------|------|------|
| CODE <sup>a</sup>            | Explanation (result categories)                                                               | CC                         | UK | UK-wf | NL-2 | SKIN |
| <b>Socio-economic status</b> |                                                                                               |                            |    |       |      |      |
| OCCUP1                       | Occupation (unemployed, child or pupil, student, household, practicing a profession, retired) | *                          | -  | -     | -    | -    |
| OCCUP1_2                     | Occupation<br>(unemployed, child or pupil, student, household, practicing a profession)       | *                          | -  | -     | -    | -    |
| <b>Household</b>             |                                                                                               |                            |    |       |      |      |
| HHMEMB1                      | Number of household members (number)                                                          | -                          | -  | -     | -    | -    |
| HHMEMB1_2                    | Number of household members (1, 2, 3, 4, 5, >5)                                               | -                          | -  | -     | -    | -    |
| HHCHILD1                     | Number of children < 5 years of age living in household                                       | -                          | -  | -     | -    | -    |
| HHCHILD1_2                   | Number of children < 5 years of age living in household (none, 1, >1)                         | -                          | *  | -     | *    | -    |
| HHCHILD1_3                   | Children < 5 years living in household (yes, no)                                              | nd                         | *  | *     | *    | nd   |
| HHVOL2                       | Other household members participating in the study (yes, no)                                  | -                          | -  | -     | -    | -    |
| HHCOLD1                      | Household member with common cold in 2 weeks before 1st interview (yes, no)                   | *                          | -  | -     | -    | nd   |
| HHTHRO1                      | Household member with sore throat in 2 weeks before 1st interview (yes, no)                   | -                          | nd | nd    | nd   | nd   |
| HHLUNG1                      | Household member with lung infection in 2 weeks before 1st interview (yes, no)                | -                          | nd | nd    | nd   | nd   |
| HHFEV1                       | Household member with fever in 2 weeks before 1st interview (yes, no)                         | -                          | -  | -     | -    | -    |
| HHNAUS1                      | Household member with nausea in 2 weeks before 1st interview (yes, no)                        | nd                         | -  | -     | -    | nd   |
| HHVOM1                       | Household member with vomiting in 2 weeks before 1st interview (yes, no)                      | nd                         | -  | -     | -    | nd   |
| HHDIAR1                      | Household member with diarrhea in 2 weeks before 1st interview (yes, no)                      | nd                         | -  | -     | -    | nd   |
| HHSKIN1                      | Household member with skin ailments in 2 weeks before 1st interview (yes, no)                 | nd                         | nd | nd    | nd   | -    |
| <b>Chronic symptoms</b>      |                                                                                               |                            |    |       |      |      |
| CHEST1                       | Chronic chest ailments (yes, no)                                                              | -                          | nd | nd    | nd   | nd   |
| CEAR1                        | Chronic ear ailments (yes, no)                                                                | -                          | nd | nd    | nd   | nd   |
| CHAY1                        | Chronic hay fever (yes, no)                                                                   | *                          | nd | nd    | nd   | -    |

**Wiedenmann A. et al.: Health risks from freshwater bathing**

**Supplemental Data, Annex 5. (continued)**

| <b>Variables</b>            |                                                                                          | <b>Disease definitions</b> |    |       |      |      |
|-----------------------------|------------------------------------------------------------------------------------------|----------------------------|----|-------|------|------|
| CODE <sup>a</sup>           | Explanation (result categories)                                                          | CC                         | UK | UK-wf | NL-2 | SKIN |
| CSTOM1                      | Chronic stomach ailments (yes, no)                                                       | nd                         | -  | *     | *    | nd   |
| CGUT1                       | Chronic gut ailments (yes, no)                                                           | nd                         | -  | -     | -    | nd   |
| ILLDIARFR1                  | Normal frequency of diarrhea<br>(never, hardly ever: 1-2 per year, often: 1-2 per month) | nd                         | *  | *     | *    | nd   |
| TRAVSICK4                   | Proneness to motion sickness (always, often, hardly ever, never)                         | nd                         | -  | -     | *    | nd   |
| CLIV1                       | Chronic liver ailments (yes, no)                                                         | nd                         | -  | -     | -    | -    |
| CSKIN1                      | Chronic skin ailments (yes, no)                                                          | nd                         | nd | nd    | nd   | *    |
| CREN1                       | Chronic renal ailments (yes, no)                                                         | nd                         | nd | nd    | nd   | -    |
| CNEUR1                      | Chronic neural ailments (yes, no)                                                        | nd                         | nd | nd    | nd   | -    |
| CDIAB1                      | Chronic diabetes (yes, no)                                                               | -                          | -  | -     | -    | -    |
| ILL6MON1                    | Any severe illness in 6 months before 1st interview (yes, no)                            | -                          | -  | -     | -    | -    |
| ILLHOSP1                    | Stay in hospital in 6 months before 1st interview (yes, no)                              | -                          | -  | -     | -    | -    |
| <b>Symptoms or ailments</b> |                                                                                          |                            |    |       |      |      |
| SYFEV1                      | Fever in three weeks before 1st interview (yes, no)                                      | *                          | -  | -     | -    | -    |
| SYFEV2                      | Fever between 1st and 2nd interview (yes, no)                                            | nd                         | nd | nd    | nd   | -    |
| SYHEAD1                     | Headache in three weeks before 1st interview (yes, no)                                   | *                          | nd | nd    | nd   | nd   |
| SYNOSE1                     | Runny nose in three weeks before 1st interview (yes, no)                                 | -                          | nd | nd    | nd   | nd   |
| SYDCOUGH1                   | Dry cough in three weeks before 1st interview (yes, no)                                  | -                          | nd | nd    | nd   | nd   |
| SYPCOUGH1                   | Productive cough in three weeks before 1st interview (yes, no)                           | -                          | nd | nd    | nd   | nd   |
| SYTHRO1                     | Sore throat in three weeks before 1st interview (yes, no)                                | -                          | nd | nd    | nd   | nd   |
| SYBREATH1                   | Breathing problems in three weeks before 1st interview (yes, no)                         | -                          | nd | nd    | nd   | nd   |
| SYCHEST1                    | Pain in the chest in three weeks before 1st interview (yes, no)                          | -                          | nd | nd    | nd   | nd   |
| SYJOINT1                    | Pain in the joints in three weeks before 1st interview (yes, no)                         | -                          | nd | nd    | nd   | nd   |
| SYEAR1                      | Ear inflammation in three weeks before 1st interview (yes, no)                           | -                          | nd | nd    | nd   | nd   |
| SYAPP1                      | Loss of appetite in three weeks before 1st interview (yes, no)                           | -                          | -  | -     | -    | nd   |

**Wiedenmann A. et al.: Health risks from freshwater bathing**

**Supplemental Data, Annex 5. (continued)**

| <b>Variables</b>  |                                                                               | <b>Disease definitions</b> |    |       |      |      |
|-------------------|-------------------------------------------------------------------------------|----------------------------|----|-------|------|------|
| CODE <sup>a</sup> | Explanation (result categories)                                               | CC                         | UK | UK-wf | NL-2 | SKIN |
| SYINDIG1          | Indigestion in three weeks before 1st interview (yes, no)                     | nd                         | -  | -     | -    | nd   |
| SYNAUS1           | Nausea in three weeks before 1st interview (yes, no)                          | nd                         | -  | -     | -    | nd   |
| SYVOM1            | Vomiting in three weeks before 1st interview (yes, no)                        | nd                         | -  | -     | -    | nd   |
| SYSTEM1           | Stomach pains or cramps in three weeks before 1st interview (yes, no)         | nd                         | -  | -     | *    | nd   |
| SYLOOSEB1         | Loose bowel motions in three weeks before 1st interview (yes, no)             | nd                         | *  | *     | *    | nd   |
| SYDIAR1           | Diarrhea in three weeks before 1st interview (yes, no)                        | nd                         | *  | *     | *    | nd   |
| SYANY_GI          | Any gastrointestinal disorders in three weeks before 1st interview (yes, no)  | nd                         | -  | -     | *    | nd   |
| SYSKIN1           | Skin ailments in three weeks before 1st interview (yes, no)                   | nd                         | nd | nd    | nd   | -    |
| SYITCH1           | Itching in three weeks before 1st interview (yes, no)                         | nd                         | nd | nd    | nd   | *    |
| SYPIN1            | Needles and pins in three weeks before 1st interview (yes, no)                | nd                         | nd | nd    | nd   | -    |
| SYSKINUL1         | Skin ulcer in three weeks before 1st interview (yes, no)                      | nd                         | nd | nd    | nd   | -    |
| <b>Medicines</b>  |                                                                               |                            |    |       |      |      |
| MED1              | Consumption of prescription drugs in 4 weeks before 1st interview (yes, no)   | -                          | -  | -     | -    | -    |
| MEDANT11          | Antibiotics in 4 weeks before 1st interview (yes, no)                         | -                          | -  | -     | -    | -    |
| MEDCORT1          | Steroids in 4 weeks before 1st interview (yes, no)                            | -                          | -  | -     | -    | -    |
| MEDLAX1           | Laxatives in 4 weeks before 1st interview (yes, no)                           | nd                         | -  | -     | -    | nd   |
| MEDSTOM1          | Stomach remedies in 4 weeks before 1st interview (yes, no)                    | nd                         | -  | -     | -    | nd   |
| <b>Food</b>       |                                                                               |                            |    |       |      |      |
| FRMEAT2           | Consumption of raw meat in two or three days before exposure (yes, no)        | nd                         | -  | -     | -    | nd   |
| nd FRMEAT3        | Consumption of raw meat in the week after exposure (yes, no)                  | nd                         | -  | -     | -    | nd   |
| FRMILK2           | Consumption of raw milk in two or three days before exposure (yes, no)        | nd                         | -  | -     | -    | nd   |
| FRMILK3           | Consumption of raw milk in the week after exposure (yes, no)                  | nd                         | -  | -     | -    | nd   |
| FRCHEESE2         | Consumption of raw milk cheese in two or three days before exposure (yes, no) | nd                         | -  | -     | -    | nd   |
| FRCHEESE3         | Consumption of raw milk cheese in the week after exposure (yes, no)           | nd                         | -  | -     | -    | nd   |



**Wiedenmann A. et al.: Health risks from freshwater bathing**

**Supplemental Data, Annex 5. (continued)**

| <b>Variables</b>  |                                                                                       | <b>Disease definitions</b> |    |       |      |      |
|-------------------|---------------------------------------------------------------------------------------|----------------------------|----|-------|------|------|
| CODE <sup>a</sup> | Explanation (result categories)                                                       | CC                         | UK | UK-wf | NL-2 | SKIN |
| FEGG2             | Consumption of scrambled eggs, omelets in two or three days before exposure (yes, no) | nd                         | -  | -     | -    | nd   |
| FEGG3             | Consumption of scrambled eggs, omelets in the week after exposure (yes, no)           | nd                         | -  | -     | -    | nd   |
| FMAYO2            | Consumption of self made mayonnaise in two or three days before exposure (yes, no)    | nd                         | -  | -     | -    | nd   |
| FMAYO3            | Consumption of self made mayonnaise in the week after exposure (yes, no)              | nd                         | -  | -     | -    | nd   |
| FTIRA2            | Consumption of tiramisu in two or three days before exposure (yes, no)                | nd                         | -  | -     | -    | nd   |
| FTIRA3            | Consumption of tiramisu in the week after exposure (yes, no)                          | nd                         | -  | -     | -    | nd   |
| FICE2             | Consumption of ice cream in two or three days before exposure (yes, no)               | nd                         | -  | -     | -    | nd   |
| FICE3             | Consumption of ice cream in the week after exposure (yes, no)                         | nd                         | -  | -     | -    | nd   |
| FCHICK2           | Consumption of chicken meat or poultry in two or three days before exposure (yes, no) | nd                         | -  | -     | -    | nd   |
| FCHICK3           | Consumption of chicken meat or poultry in the week after exposure (yes, no)           | nd                         | -  | -     | -    | nd   |
| FFASTF2           | Consumption of fast-food in two or three days before exposure (yes, no)               | nd                         | -  | -     | -    | nd   |
| FFASTF3           | Consumption of fast-food in the week after exposure (yes, no)                         | nd                         | -  | -     | -    | nd   |
| FBURGER2          | Consumption of hamburgers in two or three days before exposure (yes, no)              | nd                         | -  | -     | -    | nd   |
| FBURGER3          | Consumption of hamburgers in the week after exposure (yes, no)                        | nd                         | -  | -     | -    | nd   |
| FHOTDOG2          | Consumption of hot dogs in two or three days before exposure (yes, no)                | nd                         | -  | *     | -    | nd   |
| FHOTDOG3          | Consumption of hot dogs in the week after exposure (yes, no)                          | nd                         | -  | -     | -    | nd   |
| FSAUSAGE2         | Consumption of grilled sausages in two or three days before exposure (yes, no)        | nd                         | -  | -     | -    | nd   |
| FSAUSAGE3         | Consumption of grilled sausages in the week after exposure (yes, no)                  | nd                         | -  | -     | -    | nd   |
| FSANDW2           | Consumption of bought sandwiches in two or three days before exposure (yes, no)       | nd                         | -  | -     | -    | nd   |
| FSANDW3           | Consumption of bought sandwiches in the week after exposure (yes, no)                 | nd                         | *  | -     | *    | nd   |
| FSALAD2           | Consumption of salads in two or three days before exposure (yes, no)                  | nd                         | -  | -     | -    | nd   |
| FSALAD3           | Consumption of salads in the week after exposure (yes, no)                            | nd                         | -  | -     | -    | nd   |

**Wiedenmann A. et al.: Health risks from freshwater bathing**

**Supplemental Data, Annex 5. (continued)**

| <b>Variables</b>          |                                                                                                                                             | <b>Disease definitions</b> |    |       |      |      |
|---------------------------|---------------------------------------------------------------------------------------------------------------------------------------------|----------------------------|----|-------|------|------|
| CODE <sup>a</sup>         | Explanation (result categories)                                                                                                             | CC                         | UK | UK-wf | NL-2 | SKIN |
| FSEAF2                    | Consumption of sea food in two or three days before exposure (yes, no)                                                                      | nd                         | -  | -     | -    | nd   |
| FSEAF3                    | Consumption of sea food in the week after exposure (yes, no)                                                                                | nd                         | -  | -     | -    | nd   |
| FBBQ2                     | Participation in a barbecuing party in two or three days before exposure (yes, no)                                                          | nd                         | -  | -     | -    | nd   |
| FBBQ3                     | Participation in a barbecuing party in the week after exposure (yes, no)                                                                    | nd                         | -  | -     | -    | nd   |
| <b>Alcohol</b>            |                                                                                                                                             |                            |    |       |      |      |
| ALC1                      | Consumption of alcohol (yes, no)                                                                                                            | -                          | -  | -     | -    | *    |
| ALC7D1                    | Amount of alcohol consumed in the week before 1st interview<br>(number of units (1 unit = 0.5 l beer, 0.25 l wine, 0.02 l spirits))         | -                          | -  | -     | -    | -    |
| ALC7D1_2                  | Amount of alcohol consumed in the week before 1st interview<br>(0, 1-5, 6-10, >10 units (1 unit = 0.5 l beer, 0.25 l wine, 0.02 l spirits)) | -                          | -  | -     | -    | -    |
| ALCUS1                    | Was this the normal amount of alcohol (yes, no)                                                                                             | -                          | -  | -     | -    | -    |
| <b>Tobacco</b>            |                                                                                                                                             |                            |    |       |      |      |
| SMOKE1                    | Smoking (yes, yes only pipe, no)                                                                                                            | -                          | -  | -     | -    | -    |
| SMOKE1_2                  | Smoking (yes, no)                                                                                                                           | -                          | -  | -     | -    | -    |
| SMOKENR1                  | Number of cigarettes per day (mean number)                                                                                                  | -                          | -  | -     | -    | -    |
| SMOKENR1_2                | Number of cigarettes per day (0, 1-5, 6-20, >20)                                                                                            | -                          | -  | -     | -    | -    |
| <b>Leisure activities</b> |                                                                                                                                             |                            |    |       |      |      |
| LEPARTY1                  | Normal frequency of party or disco visits per month<br>(never, sometimes: 1-3, often: >3)                                                   | *                          | -  | -     | -    | -    |
| LEPUB1                    | Normal frequency of pub visits per month<br>(never, sometimes: 1-3, often: >3)                                                              | *                          | -  | *     | -    | *    |
| LESPORT1                  | Normal frequency of sports activities per month<br>(never, sometimes: 1-3, often: >3)                                                       | *                          | -  | -     | *    | -    |

**Wiedenmann A. et al.: Health risks from freshwater bathing**

**Supplemental Data, Annex 5. (continued)**

| Variables<br>CODE <sup>a</sup> | Explanation (result categories)                                                                                                               | Disease definitions |    |       |      |      |
|--------------------------------|-----------------------------------------------------------------------------------------------------------------------------------------------|---------------------|----|-------|------|------|
|                                |                                                                                                                                               | CC                  | UK | UK-wf | NL-2 | SKIN |
| LECIN1                         | Normal frequency of cinema visits per month<br>(never, sometimes: 1-3, often: >3)                                                             | -                   | nd | nd    | nd   | nd   |
| LEOTHER1                       | Normal frequency of other activities involving contact to large groups<br>of people (never, sometimes: 1-3, often: >3)                        | -                   | nd | nd    | nd   | nd   |
| <b>Travel history</b>          |                                                                                                                                               |                     |    |       |      |      |
| TRAVEL1                        | Overnight stays outside household in 4 weeks before 1st interview (yes, no)                                                                   | *                   | -  | -     | -    | -    |
| TRAVPL1                        | Traveling abroad in 4 weeks before 1st interview (yes, no)                                                                                    | -                   | -  | -     | -    | -    |
| <b>Water related</b>           |                                                                                                                                               |                     |    |       |      |      |
| BP_WATER                       | Exposed and swallowed water during trial (no, tea-spoon, table-spoon, cup)                                                                    | -                   | -  | -     | -    | nd   |
| BP_Water_B-nein_B-ja           | Exposed and swallowed water during trial (yes, no)                                                                                            | -                   | -  | *     | -    | nd   |
| BP_Water_NB=0_B=1-4            | Swallowed water during trial<br>(unexposed or exposed and no, tea-spoon, table-spoon, cup)                                                    | -                   | *  | *     | -    | nd   |
| BP_Water_NB_B-n_B-j            | Swallowed water during trial<br>(unexposed, exposed and no, exposed and yes)                                                                  | -                   | *  | *     | *    | nd   |
| BATH1                          | Normal frequency of bathing in natural recreational waters (fresh or sea<br>water) per month during summer (never; sometimes: 1-3; often: >3) | -                   | -  | -     | -    | -    |
| BATH2                          | Swimming or bathing in the two or three days between 1st and 2nd<br>interview (yes, no)                                                       | -                   | -  | -     | -    | -    |
| BATH3                          | Additional swimming or bathing in the week after the trial day (yes, no)                                                                      | -                   | -  | -     | -    | -    |
| BATHFR1                        | Frequency of bathing in 4 weeks before 1st interview                                                                                          | -                   | -  | -     | -    | -    |
| BATHFR1_2                      | Frequency of bathing in 4 weeks before 1st interview (0, 1-5, >5)                                                                             | -                   | -  | -     | -    | -    |
| HBEACH1                        | Normal frequency of going to a beach without entering the water<br>per month (never, sometimes: 1-3, often: >3)                               | *                   | -  | -     | -    | -    |

**Wiedenmann A. et al.: Health risks from freshwater bathing**

**Supplemental Data, Annex 5. (continued)**

| <b>Variables</b>  |                                                                                                     | <b>Disease definitions</b> |    |       |      |      |
|-------------------|-----------------------------------------------------------------------------------------------------|----------------------------|----|-------|------|------|
| CODE <sup>a</sup> | Explanation (result categories)                                                                     | CC                         | UK | UK-wf | NL-2 | SKIN |
| HBEACHFR1         | Number of beach visits without entering the water in the 4 weeks before 1st interview (number)      | -                          | -  | -     | -    | -    |
| HBEACHFR1_2       | Number of beach visits without entering the water in 4 weeks before 1st interview (0, 1-5, >5)      | -                          | -  | -     | -    | -    |
| HBEACHFR1_3       | Beach visits without entering the water in 4 weeks before 1st interview (yes, no)                   | -                          | nd | nd    | nd   | nd   |
| HPUPOOL1          | Normal frequency of using a public pool per month (never, sometimes: 1-3, often: >3)                | *                          | -  | -     | -    | -    |
| HPRPOOL1          | Normal frequency of using a private pool per month during summer (never; sometimes: 1-3; often: >3) | -                          | -  | -     | -    | -    |
| HPRPOOL1_2        | Utilization of private pools (yes, no)                                                              | *                          | -  | -     | -    | -    |
| HLEPARK1          | Visit to a leisure park with water activities in 4 weeks before 1st interview (yes, no)             | -                          | -  | -     | -    | *    |
| BASWIMDIS1        | Maximal swimming distance (number of meters)                                                        | -                          | -  | -     | -    | -    |
| BASWIMDIS1_2      | Maximal swimming distance (-50, >50 m)                                                              | -                          | -  | -     | -    | -    |
| BASWIMDUR1        | Maximal swimming duration (number of minutes)                                                       | -                          | -  | -     | -    | -    |
| BASWIMDUR1_2      | Maximal swimming duration (10 min, 20 min, 30 min, 1 h, 2 h)                                        | -                          | -  | -     | -    | -    |
| WASURF1           | Normal frequency of surfing during summer (never, sometimes: 1-3, often: >3)                        | *                          | -  | -     | -    | -    |
| WAPAD1            | Normal frequency of paddling during summer (never, sometimes: 1-3, often: >3)                       | -                          | -  | -     | -    | -    |
| WACANOE1          | Normal frequency of canoeing during summer (never, sometimes: 1-3, often: >3)                       | *                          | -  | -     | -    | -    |
| WAMOTOR1          | Normal frequency of motorboating during summer (never, once or more)                                | *                          | -  | -     | -    | -    |
| WADIV1            | Normal frequency of diving during summer (never, once or more)                                      | *                          | -  | -     | -    | -    |
| WAFISH1           | Normal frequency of fishing during summer (never, once or more)                                     | -                          | -  | -     | -    | -    |

**Wiedenmann A. et al.: Health risks from freshwater bathing**

**Supplemental Data, Annex 5. (continued)**

| Variables<br>CODE <sup>a</sup> | Explanation (result categories)                                                                             | Disease definitions |    |       |      |      |
|--------------------------------|-------------------------------------------------------------------------------------------------------------|---------------------|----|-------|------|------|
|                                |                                                                                                             | CC                  | UK | UK-wf | NL-2 | SKIN |
| <b>Risk perception</b>         |                                                                                                             |                     |    |       |      |      |
| WADA4                          | Are water related activities considered to be dangerous (yes, no)                                           | -                   | -  | -     | -    | -    |
| BBILL4                         | Ever gone to a beach while feeling ill (yes, no)                                                            | *                   | -  | -     | -    | -    |
| BBILLWAT4                      | Did feeling ill prevent from entering the water (yes, no)                                                   | -                   | -  | -     | -    | -    |
| WQNBBEACH4                     | Ever refused to go bathing because beach was too dirty (yes, no)                                            | -                   | *  | *     | *    | -    |
| WQNBWATER4                     | Ever refused to go bathing because water was too dirty (yes, no)                                            | -                   | -  | *     | -    | -    |
| WQNBWAVES4                     | Ever refused to go bathing because waves were too rough (yes, no)                                           | -                   | -  | -     | -    | -    |
| WQNBHRISK4                     | Ever refused to go bathing because of fear to become ill (yes, no)                                          | -                   | -  | -     | -    | *    |
| SUNBFR4                        | Frequency of sunburns after beach visits (always, often, hardly ever, never)                                | nd                  | nd | nd    | nd   | -    |
| SUNBMED4                       | Are sunburns treated (always, often, hardly ever, never)                                                    | nd                  | nd | nd    | nd   | -    |
| <b>Information</b>             |                                                                                                             |                     |    |       |      |      |
| IRECRUIT4                      | Initial source of information about this study<br>(partner, recruitment team, television, newspaper, other) | -                   | -  | -     | -    | -    |
| IMEDIA4                        | Having seen or heard news about this study (yes, no)                                                        | -                   | -  | -     | -    | -    |
| INEWSPAP4                      | Regular reading of a newspaper (yes, no)                                                                    | -                   | -  | -     | -    | -    |
| IENVORG4                       | Member of an environmental organisation (yes, no)                                                           | -                   | -  | -     | -    | -    |
| WQCONTR4                       | Informed about the control of beaches in Germany (yes, no)                                                  | *                   | -  | -     | -    | -    |
| WQCONTRPN4                     | Quality of information on control of beaches in Germany (positive or negative)                              | *                   | -  | -     | -    | *    |
| WQCONTRWO4                     | Worried about information on the control of beaches in Germany<br>(no, a bit, very much)                    | -                   | -  | -     | -    | -    |
| WQCONTRWO4_2                   | Worried about information on the control of beaches in Germany (yes, no)                                    |                     |    |       |      |      |
| WQCLEAN4                       | Information on the cleanliness of recreational waters in Germany (yes, no)                                  | *                   | *  | -     | *    | -    |
| WQCLEANPN4                     | Quality of information on cleanliness of German recreational waters<br>(positive or negative)               | *                   | -  | -     | -    | -    |

**Wiedenmann A. et al.:** Health risks from freshwater bathing

**Supplemental Data, Annex 5.** (continued)

---

Abbreviations: CC, common cold; UK, Gastroenteritis definition UK; UK-wf, Gastroenteritis definition UK-wf; NL-2, Gastroenteritis definition NL-2; nd, not done. <sup>a</sup> CODE is the variable code in the computer data set. \* *p*-Value for Pearson's Chi Square test < 0.05. - *p*-Value for Pearson's Chi Square test  $\geq$  0.05.

**Wiedenmann A. et al.:** Health risks from freshwater bathing

**Supplemental Data, Annex 6.** Analysis of potential NOAELs and potential confounding variables by multiple logistic regression (Effect Likelihood Ratio Tests) for exposure definition 1 ("10 minutes bathing; three or more head immersions").

| Disease Indicator                           | Potential NOAEL | <i>p</i> -Value <sup>a</sup> | Better predictor <sup>b</sup> | Status           | Confounding or interacting variable                                 | <i>p</i> -Value <sup>c</sup> |
|---------------------------------------------|-----------------|------------------------------|-------------------------------|------------------|---------------------------------------------------------------------|------------------------------|
| <b>Acute febrile respiratory infections</b> |                 |                              |                               |                  |                                                                     |                              |
| EC                                          | ---             |                              |                               |                  |                                                                     |                              |
| IE                                          | ---             |                              |                               |                  |                                                                     |                              |
| CP                                          | ---             |                              |                               |                  |                                                                     |                              |
| SOMCP                                       | ---             |                              |                               |                  |                                                                     |                              |
| AE                                          | ---             |                              |                               |                  |                                                                     |                              |
| PA                                          | ---             |                              |                               |                  |                                                                     |                              |
| <b>Common cold</b>                          |                 |                              |                               |                  |                                                                     |                              |
| EC                                          | 261             | 0.0007                       |                               | Confounded by    | Quality of information on control of beaches in Germany             | 0.0067                       |
|                                             |                 |                              |                               | Confounded by    | Quality of information on cleanliness of German recreational waters | 0.0184                       |
| IE                                          | 132             | 0.0010                       |                               | Confounded by    | Quality of information on control of beaches in Germany             | 0.0073                       |
|                                             |                 |                              |                               | Interaction with | Headache in three weeks before 1st interview                        | 0.0100                       |
|                                             |                 |                              |                               | Interaction with | Ever gone to a beach while feeling ill                              | 0.0417                       |
| CP                                          | 30 <sup>d</sup> | 0.0220                       |                               | Confounded by    | Study location                                                      | 0.0014                       |
|                                             |                 |                              |                               | Confounded by    | Weather conditions                                                  | 0.0001                       |
|                                             |                 |                              |                               | Confounded by    | Age grouped by 10-years intervals                                   | 0.0000                       |
|                                             |                 |                              |                               | Confounded by    | Age grouped by 10-year intervals and 60+                            | 0.0000                       |
|                                             |                 |                              |                               | Confounded by    | Degree                                                              | 0.0037                       |
|                                             |                 |                              |                               | Confounded by    | Degree (definition 2)                                               | 0.0013                       |
|                                             |                 |                              |                               | Confounded by    | Occupation                                                          | 0.0005                       |
|                                             |                 |                              |                               | Confounded by    | Occupation (definition 2))                                          | 0.0002                       |

**Wiedenmann A. et al.:** Health risks from freshwater bathing

**Supplemental Data, Annex 6.** (continued).

| <b>Disease</b>          | Potential |                              | Better                 |                  |                                                                      |                              |
|-------------------------|-----------|------------------------------|------------------------|------------------|----------------------------------------------------------------------|------------------------------|
| Indicator               | NOAEL     | <i>p</i> -Value <sup>a</sup> | predictor <sup>b</sup> | Status           | Confounding or interacting variable                                  | <i>p</i> -Value <sup>c</sup> |
|                         |           |                              |                        | Confounded by    | Quality of information on control of beaches in Germany              | 0.0114                       |
|                         |           |                              |                        | Confounded by    | Quality of information on control of beaches in Germany              | 0.0190                       |
|                         |           |                              |                        | Interaction with | Ever gone to a beach while feeling ill                               | 0.0006                       |
| SOMCP                   | 128       | 0.0012                       |                        | Confounded by    | Study location                                                       | 0.0125                       |
|                         |           |                              |                        | Confounded by    | Weather conditions                                                   | 0.0007                       |
|                         |           |                              |                        | Confounded by    | Quality of information on control of beaches in Germany              | 0.0082                       |
|                         |           |                              |                        | Confounded by    | Quality of information on control of beaches in Germany              | 0.0195                       |
|                         |           |                              |                        | Interaction with | Overnight stays outside household in 4 weeks<br>before 1st interview | 0.0014                       |
| AE                      | ---       |                              |                        |                  |                                                                      |                              |
| PA                      | ---       |                              |                        |                  |                                                                      |                              |
| <b>Ear inflammation</b> |           |                              |                        |                  |                                                                      |                              |
| IE                      | ---       |                              |                        |                  |                                                                      |                              |
| CP                      | ---       |                              |                        |                  |                                                                      |                              |
| SOMCP                   | ---       |                              |                        |                  |                                                                      |                              |
| AE                      | ---       |                              |                        |                  |                                                                      |                              |
| PA                      | ---       |                              |                        |                  |                                                                      |                              |
| <b>Eye inflammation</b> |           |                              |                        |                  |                                                                      |                              |
| EC                      | ---       |                              |                        |                  |                                                                      |                              |
| IE                      | ---       |                              |                        |                  |                                                                      |                              |
| CP                      | ---       |                              |                        |                  |                                                                      |                              |
| SOMCP                   | ---       |                              |                        |                  |                                                                      |                              |
| AE                      | ---       |                              |                        |                  |                                                                      |                              |
| PA                      | ---       |                              |                        |                  |                                                                      |                              |



**Wiedenmann A. et al.:** Health risks from freshwater bathing

**Supplemental Data, Annex 6.** (continued).

| Disease Indicator                         | Potential NOAEL | p-Value <sup>a</sup> | Better predictor <sup>b</sup> | Status                  | Confounding or interacting variable                                | p-Value <sup>c</sup> |
|-------------------------------------------|-----------------|----------------------|-------------------------------|-------------------------|--------------------------------------------------------------------|----------------------|
| <b>Gastroenteritis (Definition UK)</b>    |                 |                      |                               |                         |                                                                    |                      |
| EC                                        | 180             | 0.0086               |                               | o.k.                    |                                                                    |                      |
| IE                                        | 24              | 0.0220               |                               | o.k.                    |                                                                    |                      |
| CP                                        | 13              | 0.0058               |                               | o.k.                    |                                                                    |                      |
| SOMCP                                     | 150             | 0.0080               | CP, EC, EN                    | o.k. / Interaction with | Loose bowel motions in three weeks before 1st interview            | 0.0354               |
| AE                                        | ---             |                      |                               |                         |                                                                    |                      |
| PA                                        | ---             |                      |                               |                         |                                                                    |                      |
| <b>Gastroenteritis (Definition UK-wf)</b> |                 |                      |                               |                         |                                                                    |                      |
| EC                                        | 78              | 0.0025               |                               | o.k.                    |                                                                    |                      |
| IE                                        | 21              | 0.0006               |                               | o.k.                    |                                                                    |                      |
| CP                                        | 13              | 0.0019               | EN                            | o.k.                    |                                                                    |                      |
| SOMCP                                     | 10              | 0.0035               |                               | o.k. / Interaction with | Loose bowel motions in three weeks before 1st interview            | 0.0173               |
| AE                                        | ---             |                      |                               |                         |                                                                    |                      |
| PA                                        | ---             |                      |                               |                         |                                                                    |                      |
| <b>Gastroenteritis (Definition NL-2)</b>  |                 |                      |                               |                         |                                                                    |                      |
| EC                                        | 167             | 0.0019               |                               | o.k.                    |                                                                    |                      |
| IE                                        | 24              | 0.0010               |                               | o.k. / Interaction with | Stomach pains or cramps in three weeks before 1st interview        | 0.0081               |
|                                           |                 |                      |                               | o.k. / Interaction with | Any gastrointestinal disorders in three weeks before 1st interview | 0.0446               |
| CP                                        | 13              | 0.0018               |                               | o.k. / Interaction with | Stomach pains or cramps in three weeks before 1st interview        | 0.0089               |
| SOMCP                                     | 10              | 0.0025               |                               | o.k. / Interaction with | Stomach pains or cramps in three weeks before 1st interview        | 0.0104               |
|                                           |                 |                      |                               | o.k. / Interaction with | Any gastrointestinal disorders                                     |                      |

**Wiedenmann A. et al.:** Health risks from freshwater bathing

**Supplemental Data, Annex 6.** (continued).

| <b>Disease</b>                         | Potential |                              | Better                 |        |                                                                     |                              |
|----------------------------------------|-----------|------------------------------|------------------------|--------|---------------------------------------------------------------------|------------------------------|
| Indicator                              | NOAEL     | <i>p</i> -Value <sup>a</sup> | predictor <sup>b</sup> | Status | Confounding or interacting variable                                 | <i>p</i> -Value <sup>c</sup> |
|                                        |           |                              |                        |        | in three weeks before 1st interview                                 | 0.0172                       |
| AE                                     | ---       |                              |                        |        |                                                                     |                              |
| PA                                     | ---       |                              |                        |        |                                                                     |                              |
| <b>Skin inflammation, cutireaction</b> |           |                              |                        |        |                                                                     |                              |
| EC                                     | ---       |                              |                        |        |                                                                     |                              |
| IE                                     | ---       |                              |                        |        |                                                                     |                              |
| CP                                     | ---       |                              |                        |        |                                                                     |                              |
| SOMCP                                  | ---       |                              |                        |        |                                                                     |                              |
| AE                                     | 5622      | 0.0006                       |                        |        | o.k. / Interaction with Weather conditions                          | 0.0022                       |
|                                        |           |                              |                        |        | o.k. / Interaction with Chronic skin ailments                       | 0.0000                       |
|                                        |           |                              |                        |        | o.k. / Interaction with Itching in three weeks before 1st interview | 0.0012                       |
|                                        |           |                              |                        |        | o.k. / Interaction with Consumption of alcohol                      | 0.0031                       |
| PA                                     | ---       |                              |                        |        |                                                                     |                              |
| <b>Urinary tract infection</b>         |           |                              |                        |        |                                                                     |                              |
| EC                                     | ---       |                              |                        |        |                                                                     |                              |
| IE                                     | ---       |                              |                        |        |                                                                     |                              |
| CP                                     | ---       |                              |                        |        |                                                                     |                              |
| SOMCP                                  | ---       |                              |                        |        |                                                                     |                              |
| AE                                     | ---       |                              |                        |        |                                                                     |                              |
| PA                                     | ---       |                              |                        |        |                                                                     |                              |

**Wiedenmann A. et al.:** Health risks from freshwater bathing

**Supplemental Data, Annex 6.** (continued).

---

Abbreviations: EC, *Escherichia coli*; IE, intestinal enterococci; CP, *Clostridium perfringens*; SOMCP, somatic coliphages; AE, aeromonads; PA, *Pseudomonas aeruginosa*; NOAEL, No Observed Adverse Effect Level (Microorganisms/100 mL); o.k., not confounded by any of the tested potential confounding variables; <sup>a</sup> Chi Square *p*-Value in a Pearson's Chi Square test comparing the incidence rates of disease below and above the potential NOAEL. <sup>b</sup> Better predictors are indicator organisms which are significantly better predictors ( $p < 0.05$ ) of the outcome (disease) in an Effect Likelihood Ratio Test modeling the disease as response variable and the NOAELs of two indicator organisms as model effects. <sup>c</sup> Chi Square *p*-value for the potential confounding or interacting variable in an Effect Likelihood Ratio Test modeling the disease as response variable and the potential NOAEL and the potential confounding variable as model effects. <sup>d</sup> rounded. --- No concentration fulfilling the validity criteria for a potential NOAEL.

**Wiedenmann A. et al.:** Health risks from freshwater bathing

**Supplemental Data, Annex 7.** Analysis of potential NOAELs and potential confounding variables by multiple logistic regression (Effect Likelihood Ratio Tests) for exposure definition 2 ("Single head immersion").

| Disease Indicator                           | Potential NOAEL | <i>p</i> -Value <sup>a</sup> | Better predictor <sup>b</sup> | Status           | Confounding or interacting variable                     | <i>p</i> -Value <sup>c</sup> |
|---------------------------------------------|-----------------|------------------------------|-------------------------------|------------------|---------------------------------------------------------|------------------------------|
| <b>Acute febrile respiratory infections</b> |                 |                              |                               |                  |                                                         |                              |
| EC                                          | ---             |                              |                               |                  |                                                         |                              |
| IE                                          | ---             |                              |                               |                  |                                                         |                              |
| CP                                          | ---             |                              |                               |                  |                                                         |                              |
| SOMCP                                       | ---             |                              |                               |                  |                                                         |                              |
| AE                                          | ---             |                              |                               |                  |                                                         |                              |
| PA                                          | ---             |                              |                               |                  |                                                         |                              |
| <b>Common cold</b>                          |                 |                              |                               |                  |                                                         |                              |
| EC                                          | 936             | 0.0130                       |                               | Confounded by    | Study location                                          | 0.0019                       |
|                                             |                 |                              |                               | Confounded by    | Weather conditions                                      | 0.0001                       |
|                                             |                 |                              |                               | Confounded by    | Age grouped by 10-years intervals                       | 0.0000                       |
|                                             |                 |                              |                               | Confounded by    | Age grouped by 10-year intervals and 60+                | 0.0000                       |
|                                             |                 |                              |                               | Confounded by    | Degree                                                  | 0.0058                       |
|                                             |                 |                              |                               | Confounded by    | Degree (definition 2)                                   | 0.0023                       |
|                                             |                 |                              |                               | Confounded by    | Occupation                                              | 0.0011                       |
|                                             |                 |                              |                               | Confounded by    | Normal frequency of sports activities per month         | 0.0174                       |
|                                             |                 |                              |                               | Confounded by    | Quality of information on control of beaches in Germany | 0.0079                       |
|                                             |                 |                              |                               | Confounded by    | Quality of information on control of beaches in Germany | 0.0211                       |
|                                             |                 |                              |                               | Interaction with | Ever gone to a beach while feeling ill                  | 0.0091                       |
| IE                                          | ---             |                              |                               |                  |                                                         |                              |
| CP                                          | ---             |                              |                               |                  |                                                         |                              |

**Wiedenmann A. et al.: Health risks from freshwater bathing**

**Supplemental Data, Annex 7. (continued).**

| Disease Indicator | Potential NOAEL | p-Value <sup>a</sup> | Better predictor <sup>b</sup> | Status           | Confounding or interacting variable                               | p-Value <sup>c</sup> |
|-------------------|-----------------|----------------------|-------------------------------|------------------|-------------------------------------------------------------------|----------------------|
| SOMCP             | 248             | 0.0052               |                               | Confounded by    | Study location                                                    | 0.0068               |
|                   |                 |                      |                               | Confounded by    | Weather conditions                                                | 0.0005               |
|                   |                 |                      |                               | Confounded by    | Degree                                                            | 0.0054               |
|                   |                 |                      |                               | Confounded by    | Degree (definition 2)                                             | 0.0021               |
|                   |                 |                      |                               | Confounded by    | Quality of information on control of beaches in Germany           | 0.0076               |
|                   |                 |                      |                               | Confounded by    | Quality of information on control of beaches in Germany           | 0.0226               |
|                   |                 |                      |                               | Interaction with | Overnight stays outside household in 4 weeks before 1st interview | 0.0188               |
|                   |                 |                      |                               | Interaction with | Normal frequency of diving during summer                          | 0.0208               |
| AE                | ---             |                      |                               |                  |                                                                   |                      |
| PA                | 40 <sup>d</sup> | 0.0500               |                               | Confounded by    | Study location                                                    | 0.0012               |
|                   |                 |                      |                               | Confounded by    | Weather conditions                                                | 0.0001               |
|                   |                 |                      |                               | Confounded by    | Age grouped by 10-years intervals                                 | 0.0000               |
|                   |                 |                      |                               | Confounded by    | Age grouped by 10-year intervals and 60+                          | 0.0000               |
|                   |                 |                      |                               | Confounded by    | Occupation                                                        | 0.0005               |
|                   |                 |                      |                               | Confounded by    | Occupation (definition 2)                                         | 0.0002               |
|                   |                 |                      |                               | Confounded by    | Household member with common cold in 2 weeks before 1st interview | 0.0170               |
|                   |                 |                      |                               | Confounded by    | Normal frequency of canoeing during summer                        | 0.0237               |
|                   |                 |                      |                               | Confounded by    | Normal frequency of using a private pool per month during summer  | 0.0132               |
|                   |                 |                      |                               | Confounded by    | Quality of information on control of beaches in Germany           | 0.0099               |
|                   |                 |                      |                               | Confounded by    | Quality of information on control of beaches in Germany           | 0.0136               |
| Interaction with  | Degree          | 0.0441               |                               |                  |                                                                   |                      |

**Wiedenmann A. et al.:** Health risks from freshwater bathing

**Supplemental Data, Annex 7.** (continued).

| Disease Indicator                      | Potential NOAEL | <i>p</i> -Value <sup>a</sup> | Better predictor <sup>b</sup> | Status                  | Confounding or interacting variable                     | <i>p</i> -Value <sup>c</sup> |
|----------------------------------------|-----------------|------------------------------|-------------------------------|-------------------------|---------------------------------------------------------|------------------------------|
|                                        |                 |                              |                               | Interaction with        | Degree (definition 2)                                   | 0.0003                       |
|                                        |                 |                              |                               | Interaction with        | Ever gone to a beach while feeling ill                  | 0.0084                       |
|                                        |                 |                              |                               | Interaction with        | Normal frequency of surfing during summer               | 0.0076                       |
| <b>Ear inflammation</b>                |                 |                              |                               |                         |                                                         |                              |
| EC                                     | ---             |                              |                               |                         |                                                         |                              |
| IE                                     | ---             |                              |                               |                         |                                                         |                              |
| CP                                     | ---             |                              |                               |                         |                                                         |                              |
| SOMCP                                  | ---             |                              |                               |                         |                                                         |                              |
| AE                                     | ---             |                              |                               |                         |                                                         |                              |
| PA                                     | ---             |                              |                               | -                       |                                                         |                              |
| <b>Eye inflammation</b>                |                 |                              |                               |                         |                                                         |                              |
| EC                                     | ---             |                              |                               |                         |                                                         |                              |
| IE                                     | ---             |                              |                               |                         |                                                         |                              |
| CP                                     | ---             |                              |                               |                         |                                                         |                              |
| SOMCP                                  | ---             |                              |                               |                         |                                                         |                              |
| AE                                     | ---             |                              |                               |                         |                                                         |                              |
| PA                                     | ---             |                              |                               |                         |                                                         |                              |
| <b>Gastroenteritis (Definition UK)</b> |                 |                              |                               |                         |                                                         |                              |
| EC                                     | 1453            | 0.0015                       |                               | o.k.                    |                                                         |                              |
| IE                                     | 123             | 0.0075                       |                               | o.k.                    |                                                         |                              |
| CP                                     | 38              | 0.0080                       | EC                            | o.k. / Interaction with | Loose bowel motions in three weeks before 1st interview | 0.0354                       |
| SOMCP                                  | 330             | 0.0058                       | EC                            | o.k.                    |                                                         |                              |
| AE                                     | ---             |                              |                               |                         |                                                         |                              |
| PA                                     | ---             |                              |                               |                         |                                                         |                              |

**Wiedenmann A. et al.:** Health risks from freshwater bathing

**Supplemental Data, Annex 7.** (continued).

| Disease Indicator                         | Potential NOAEL | p-Value <sup>a</sup> | Better predictor <sup>b</sup> | Status                  | Confounding or interacting variable                         | p-Value <sup>c</sup> |
|-------------------------------------------|-----------------|----------------------|-------------------------------|-------------------------|-------------------------------------------------------------|----------------------|
| <b>Gastroenteritis (Definition UK-wf)</b> |                 |                      |                               |                         |                                                             |                      |
| EC                                        | ---             |                      |                               |                         |                                                             |                      |
| IE                                        | 123             | 0.0005               |                               | o.k.                    |                                                             |                      |
| CP                                        | 38              | 0.0043               | EC, EN                        | o.k.                    |                                                             |                      |
| SOMCP                                     | 50              | 0.0049               |                               | o.k. / Interaction with | Loose bowel motions in three weeks before 1st interview     | 0.0189               |
| AE                                        | 13600           | 0.0370               | CP, EC, EN                    | o.k.                    |                                                             |                      |
| PA                                        | ---             |                      |                               |                         |                                                             |                      |
| <b>Gastroenteritis (Definition NL-2)</b>  |                 |                      |                               |                         |                                                             |                      |
| EC                                        | 2163            | 0.0030               | CP, EN                        | o.k.                    |                                                             |                      |
| IE                                        | 145             | 0.0018               |                               | o.k. / Interaction with | Stomach pains or cramps in three weeks before 1st interview | 0.0084               |
| IE                                        |                 |                      |                               | o.k. / Interaction with | Proneness to motion sickness                                | 0.0152               |
| CP                                        | 36              | 0.0032               |                               | o.k. / Interaction with | Stomach pains or cramps in three weeks before 1st interview | 0.0234               |
| SOMCP                                     | 119             | 0.0180               |                               | o.k. / Interaction with | Stomach pains or cramps in three weeks before 1st interview | 0.0319               |
| AE                                        | ---             |                      |                               |                         |                                                             |                      |
| PA                                        | ---             |                      |                               |                         |                                                             |                      |
| <b>Skin inflammation, cutireaction</b>    |                 |                      |                               |                         |                                                             |                      |
| EC                                        | n. a.           |                      |                               |                         |                                                             |                      |
| IE                                        | n. a.           |                      |                               |                         |                                                             |                      |
| CP                                        | n. a.           |                      |                               |                         |                                                             |                      |
| SOMCP                                     | n. a.           |                      |                               |                         |                                                             |                      |
| AE                                        | n. a.           |                      |                               |                         |                                                             |                      |
| PA                                        | n. a.           |                      |                               |                         |                                                             |                      |

**Wiedenmann A. et al.:** Health risks from freshwater bathing

**Supplemental Data, Annex 7.** (continued).

| Disease                        | Potential |                              | Better                 |        |                                     |                              |
|--------------------------------|-----------|------------------------------|------------------------|--------|-------------------------------------|------------------------------|
| Indicator                      | NOAEL     | <i>p</i> -Value <sup>a</sup> | predictor <sup>b</sup> | Status | Confounding or interacting variable | <i>p</i> -Value <sup>c</sup> |
| <b>Urinary tract infection</b> |           |                              |                        |        |                                     |                              |
| EC                             | n. a.     |                              |                        |        |                                     |                              |
| IE                             | n. a.     |                              |                        |        |                                     |                              |
| CP                             | n. a.     |                              |                        |        |                                     |                              |
| SOMCP                          | n. a.     |                              |                        |        |                                     |                              |
| AE                             | n. a.     |                              |                        |        |                                     |                              |
| PA                             | n. a.     |                              |                        |        |                                     |                              |

Abbreviations: EC, Escherichia coli; IE, intestinal enterococci; CP, Clostridium perfringens; SOMCP, somatic coliphages; AE, aeromonads; PA, Pseudomonas aeruginosa; NOAEL, No Observed Adverse Effect Level (Microorganisms/100 mL); o.k., not confounded by any of the tested potential confounding variables; <sup>a</sup> Chi Square *p*-Value in a Pearson's Chi Square test comparing the incidence rates of disease below and above the potential NOAEL. <sup>b</sup> Better predictors are indicator organisms which are significantly better predictors (*p*<0.05) of the outcome (disease) in an Effect Likelihood Ratio Test modeling the disease as response variable and the NOAELs of two indicator organisms as model effects. <sup>c</sup> Chi Square *p*-value for the potential confounding or interacting variable in an Effect Likelihood Ratio Test modeling the disease as response variable and the potential NOAEL and the potential confounding variable as model effects. <sup>d</sup> rounded. --- No concentration fulfilling the validity criteria for a potential NOAEL.



**Wiedenmann A. et al.:** Health risks from freshwater bathing

**Supplemental Data, Annex 8.** Incidence rates of gastroenteritis and influence of swallowing water below and above NOAELs of fecal indicator organisms.

| NOAEL <sup>a</sup><br>(MO/100mL)                                                     | Exposure Status | Cases | n    | IR <sup>b</sup><br>(%) | p-Value <sup>c</sup> | RR <sup>d</sup><br>[ LL; UL ] | aR <sup>e</sup> | "SW?" | Cases | n    | IR<br>(%) | p-Value   | aR <sup>f</sup> |
|--------------------------------------------------------------------------------------|-----------------|-------|------|------------------------|----------------------|-------------------------------|-----------------|-------|-------|------|-----------|-----------|-----------------|
| <b>Exposure Definition 1: "10 minutes bathing with at least 3 head immersions"</b>   |                 |       |      |                        |                      |                               |                 |       |       |      |           |           |                 |
| <b><i>Escherichia coli</i>/100mL by gastroenteritis definition "UK"</b> <sup>i</sup> |                 |       |      |                        |                      |                               |                 |       |       |      |           |           |                 |
|                                                                                      | Unexposed       | 13    | 920  | 1.4                    |                      |                               |                 |       | 13    | 920  | 1.4       |           |                 |
| 180                                                                                  | Exposed ≤ NOAEL | 7     | 409  | 1.7                    | 0.68                 |                               |                 | "no"  | 3     | 247  | 1.2       | 1.00      |                 |
|                                                                                      |                 |       |      |                        |                      |                               |                 | "yes" | 4     | 162  | 2.5       | 0.30      | 1.3             |
|                                                                                      | Exposed > NOAEL | 21    | 419  | 5.0                    | 0.009 **             | 3.5 [ 1.8; 7.0 ]              | 3.6             | "no"  | 6     | 198  | 3.0       | 0.13      |                 |
|                                                                                      |                 |       |      |                        |                      |                               |                 | "yes" | 15    | 217  | 6.9       | <0.001*** | 3.9             |
|                                                                                      | Total           | 41    | 1748 |                        |                      |                               |                 |       | 41    | 1744 |           |           |                 |
| <b>Exposure Definition 1: "10 minutes bathing with at least 3 head immersions"</b>   |                 |       |      |                        |                      |                               |                 |       |       |      |           |           |                 |
| <b><i>Escherichia coli</i>/100mL by gastroenteritis definition "UK-wf"</b>           |                 |       |      |                        |                      |                               |                 |       |       |      |           |           |                 |
|                                                                                      | Unexposed       | 26    | 921  | 2.8                    |                      |                               |                 |       | 26    | 921  | 2.8       |           |                 |
| 78                                                                                   | Exposed ≤ NOAEL | 5     | 259  | 1.9                    | 0.43                 |                               |                 | "no"  | 2     | 155  | 1.3       | 0.41      |                 |
|                                                                                      |                 |       |      |                        |                      |                               |                 | "yes" | 3     | 104  | 2.9       | 1.00      | 1.6             |
|                                                                                      | Exposed > NOAEL | 41    | 579  | 7.1                    | 0.002 **             | 2.5 [ 1.6; 4.0 ]              | 4.3             | "no"  | 17    | 296  | 5.7       | 0.02 *    |                 |
|                                                                                      |                 |       |      |                        |                      |                               |                 | "yes" | 24    | 279  | 8.6       | <0.001*** | 2.9             |
|                                                                                      | Total           | 72    | 1759 |                        |                      |                               |                 |       | 72    | 1755 |           |           |                 |
| <b>Exposure Definition 1: "10 minutes bathing with at least 3 head immersions"</b>   |                 |       |      |                        |                      |                               |                 |       |       |      |           |           |                 |
| <b><i>Escherichia coli</i>/100mL by gastroenteritis definition "NL-2"</b>            |                 |       |      |                        |                      |                               |                 |       |       |      |           |           |                 |
|                                                                                      | Unexposed       | 48    | 921  | 5.2                    |                      |                               |                 |       | 48    | 921  | 5.2       |           |                 |
| 167                                                                                  | Exposed ≤ NOAEL | 18    | 396  | 4.5                    | 0.61                 |                               |                 | "no"  | 10    | 241  | 4.1       | 0.50      |                 |
|                                                                                      |                 |       |      |                        |                      |                               |                 | "yes" | 8     | 155  | 5.2       | 0.98      | 1.0             |
|                                                                                      | Exposed > NOAEL | 45    | 441  | 10.2                   | 0.002 **             | 2.0 [ 1.3; 2.9 ]              | 5.0             | "no"  | 18    | 210  | 8.6       | 0.06      |                 |
|                                                                                      |                 |       |      |                        |                      |                               |                 | "yes" | 27    | 227  | 11.9      | <0.001*** | 3.3             |
|                                                                                      | Total           | 111   | 1758 |                        |                      |                               |                 |       | 111   | 1754 |           |           |                 |

**Wiedenmann A. et al.: Health risks from freshwater bathing**  
**Supplemental Data, Annex 8. (continued)**

| NOAEL <sup>a</sup><br>(MO/100mL)                                                   | Exposure Status | Cases | n    | IR <sup>b</sup><br>(%) | p-Value <sup>c</sup> | RR <sup>d</sup> | 95% CI<br>[ LL; UL ] | aR <sup>e</sup> | "SW?" | Cases | n    | IR<br>(%) | p-Value   | aR <sup>f</sup> |
|------------------------------------------------------------------------------------|-----------------|-------|------|------------------------|----------------------|-----------------|----------------------|-----------------|-------|-------|------|-----------|-----------|-----------------|
| <b>Exposure Definition 1: "10 minutes bathing with at least 3 head immersions"</b> |                 |       |      |                        |                      |                 |                      |                 |       |       |      |           |           |                 |
| <b>Intestinal enterococci/100mL by gastroenteritis definition "UK"</b>             |                 |       |      |                        |                      |                 |                      |                 |       |       |      |           |           |                 |
|                                                                                    | Unexposed       | 13    | 920  | 1.4                    |                      |                 |                      |                 |       | 13    | 920  | 1.4       |           |                 |
| 24                                                                                 | Exposed ≤ NOAEL | 5     | 320  | 1.6                    | 0.79                 |                 |                      |                 | "no"  | 2     | 189  | 1.1       | 1.00      |                 |
|                                                                                    |                 |       |      |                        |                      |                 |                      |                 | "yes" | 3     | 129  | 2.3       | 0.43      | 1.3             |
|                                                                                    | Exposed > NOAEL | 23    | 508  | 4.5                    | 0.02 *               | 3.2             | [ 1.6; 6.3 ]         | 3.1             | "no"  | 7     | 256  | 2.7       | 0.17      |                 |
|                                                                                    |                 |       |      |                        |                      |                 |                      |                 | "yes" | 16    | 250  | 6.4       | <0.001*** | 3.7             |
|                                                                                    | Total           | 41    | 1748 |                        |                      |                 |                      |                 |       | 41    | 1744 |           |           |                 |
| <b>Exposure Definition 1: "10 minutes bathing with at least 3 head immersions"</b> |                 |       |      |                        |                      |                 |                      |                 |       |       |      |           |           |                 |
| <b>Intestinal enterococci/100mL by gastroenteritis definition "UK-wf"</b>          |                 |       |      |                        |                      |                 |                      |                 |       |       |      |           |           |                 |
|                                                                                    | Unexposed       | 26    | 921  | 2.8                    |                      |                 |                      |                 |       | 26    | 921  | 2.8       |           |                 |
| 21                                                                                 | Exposed ≤ NOAEL | 6     | 307  | 2.0                    | 0.41                 |                 |                      |                 | "no"  | 3     | 181  | 1.7       | 0.61      |                 |
|                                                                                    |                 |       |      |                        |                      |                 |                      |                 | "yes" | 3     | 126  | 2.4       | 1.00      | 0.7             |
|                                                                                    | Exposed > NOAEL | 40    | 531  | 7.5                    | <0.001***            | 2.7             | [ 1.7; 4.3 ]         | 4.7             | "no"  | 16    | 270  | 5.9       | 0.02 *    |                 |
|                                                                                    |                 |       |      |                        |                      |                 |                      |                 | "yes" | 24    | 257  | 9.3       | <0.001*** | 3.4             |
|                                                                                    | Total           | 72    | 1759 |                        |                      |                 |                      |                 |       | 72    | 1755 |           |           |                 |
| <b>Exposure Definition 1: "10 minutes bathing with at least 3 head immersions"</b> |                 |       |      |                        |                      |                 |                      |                 |       |       |      |           |           |                 |
| <b>Intestinal enterococci/100mL by gastroenteritis definition "NL-2"</b>           |                 |       |      |                        |                      |                 |                      |                 |       |       |      |           |           |                 |
|                                                                                    | Unexposed       | 48    | 921  | 5.2                    |                      |                 |                      |                 |       | 48    | 921  | 5.2       |           |                 |
| 24                                                                                 | Exposed ≤ NOAEL | 12    | 321  | 3.7                    | 0.29                 |                 |                      |                 | "no"  | 5     | 190  | 2.6       | 0.13      |                 |
|                                                                                    |                 |       |      |                        |                      |                 |                      |                 | "yes" | 7     | 129  | 5.4       | 0.92      | 2.8             |
|                                                                                    | Exposed > NOAEL | 51    | 516  | 9.9                    | 0.001 **             | 1.9             | [ 1.3; 2.8 ]         | 4.7             | "no"  | 23    | 261  | 8.8       | 0.03 *    |                 |
|                                                                                    |                 |       |      |                        |                      |                 |                      |                 | "yes" | 28    | 253  | 11.1      | <0.001*** | 2.3             |
|                                                                                    | Total           | 111   | 1758 |                        |                      |                 |                      |                 |       | 111   | 1754 |           |           |                 |

**Wiedenmann A. et al.: Health risks from freshwater bathing**  
**Supplemental Data, Annex 8. (continued)**

| NOAEL <sup>a</sup><br>(MO/100mL)                                                   | Exposure Status | Cases | n    | IR <sup>b</sup><br>(%) | p-Value <sup>c</sup> | RR <sup>d</sup> | 95% CI<br>[ LL; UL ] | aR <sup>e</sup> | "SW?" | Cases | n    | IR<br>(%) | p-Value   | aR <sup>f</sup> |
|------------------------------------------------------------------------------------|-----------------|-------|------|------------------------|----------------------|-----------------|----------------------|-----------------|-------|-------|------|-----------|-----------|-----------------|
| <b>Exposure Definition 1: "10 minutes bathing with at least 3 head immersions"</b> |                 |       |      |                        |                      |                 |                      |                 |       |       |      |           |           |                 |
| <b><i>Clostridium perfringens</i>/100mL by gastroenteritis definition "UK"</b>     |                 |       |      |                        |                      |                 |                      |                 |       |       |      |           |           |                 |
|                                                                                    | Unexposed       | 13    | 920  | 1.4                    |                      |                 |                      |                 |       | 13    | 920  | 1.4       |           |                 |
| 13                                                                                 | Exposed ≤ NOAEL | 4     | 329  | 1.2                    | 1.00                 |                 |                      |                 | "no"  | 2     | 192  | 1.0       | 1.00      |                 |
|                                                                                    |                 |       |      |                        |                      |                 |                      |                 | "yes" | 2     | 135  | 1.5       | 1.00      | 0.4             |
|                                                                                    | Exposed > NOAEL | 24    | 508  | 4.7                    | 0.006 **             | 3.3             | [ 1.7; 6.5 ]         | 3.3             | "no"  | 7     | 256  | 2.7       | 0.17      |                 |
|                                                                                    |                 |       |      |                        |                      |                 |                      |                 | "yes" | 17    | 250  | 6.8       | <0.001*** | 4.1             |
|                                                                                    | Total           | 41    | 1757 |                        |                      |                 |                      |                 |       | 41    | 1753 |           |           |                 |
| <b>Exposure Definition 1: "10 minutes bathing with at least 3 head immersions"</b> |                 |       |      |                        |                      |                 |                      |                 |       |       |      |           |           |                 |
| <b><i>Clostridium perfringens</i>/100mL by gastroenteritis definition "UK-wf"</b>  |                 |       |      |                        |                      |                 |                      |                 |       |       |      |           |           |                 |
|                                                                                    | Unexposed       | 26    | 921  | 2.8                    |                      |                 |                      |                 |       | 26    | 921  | 2.8       |           |                 |
| 13                                                                                 | Exposed ≤ NOAEL | 8     | 331  | 2.4                    | 0.70                 |                 |                      |                 | "no"  | 4     | 193  | 2.1       | 0.56      |                 |
|                                                                                    |                 |       |      |                        |                      |                 |                      |                 | "yes" | 4     | 136  | 2.9       | 1.00      | 0.9             |
|                                                                                    | Exposed > NOAEL | 38    | 516  | 7.4                    | 0.002 **             | 2.6             | [ 1.6; 4.3 ]         | 4.5             | "no"  | 15    | 261  | 5.7       | 0.02 *    |                 |
|                                                                                    |                 |       |      |                        |                      |                 |                      |                 | "yes" | 23    | 253  | 9.1       | <0.001*** | 3.3             |
|                                                                                    | Total           | 72    | 1768 |                        |                      |                 |                      |                 |       | 72    | 1764 |           |           |                 |
| <b>Exposure Definition 1: "10 minutes bathing with at least 3 head immersions"</b> |                 |       |      |                        |                      |                 |                      |                 |       |       |      |           |           |                 |
| <b><i>Clostridium perfringens</i>/100mL by gastroenteritis definition "NL-2"</b>   |                 |       |      |                        |                      |                 |                      |                 |       |       |      |           |           |                 |
|                                                                                    | Unexposed       | 48    | 921  | 5.2                    |                      |                 |                      |                 |       | 48    | 921  | 5.2       |           |                 |
| 13                                                                                 | Exposed ≤ NOAEL | 13    | 331  | 3.9                    | 0.35                 |                 |                      |                 | "no"  | 7     | 193  | 3.6       | 0.36      |                 |
|                                                                                    |                 |       |      |                        |                      |                 |                      |                 | "yes" | 6     | 136  | 4.4       | 0.69      | 0.8             |
|                                                                                    | Exposed > NOAEL | 50    | 515  | 9.7                    | 0.002 **             | 1.9             | [ 1.3; 2.7 ]         | 4.5             | "no"  | 21    | 261  | 8.0       | 0.08      |                 |
|                                                                                    |                 |       |      |                        |                      |                 |                      |                 | "yes" | 29    | 252  | 11.5      | <0.001*** | 3.5             |
|                                                                                    | Total           | 111   | 1767 |                        |                      |                 |                      |                 |       | 111   | 1763 |           |           |                 |

**Wiedenmann A. et al.: Health risks from freshwater bathing**  
**Supplemental Data, Annex 8. (continued)**

| NOAEL <sup>a</sup><br>(MO/100mL)                                                   | Exposure Status | Cases | n    | IR <sup>b</sup><br>(%) | p-Value <sup>c</sup> | RR <sup>d</sup> | 95% CI<br>[ LL; UL ] | aR <sup>e</sup> | "SW?" | Cases | n    | IR<br>(%) | p-Value   | aR <sup>f</sup> |
|------------------------------------------------------------------------------------|-----------------|-------|------|------------------------|----------------------|-----------------|----------------------|-----------------|-------|-------|------|-----------|-----------|-----------------|
| <b>Exposure Definition 1: "10 minutes bathing with at least 3 head immersions"</b> |                 |       |      |                        |                      |                 |                      |                 |       |       |      |           |           |                 |
| <b>Somatic coliphages/100mL by gastroenteritis definition "UK"</b>                 |                 |       |      |                        |                      |                 |                      |                 |       |       |      |           |           |                 |
|                                                                                    | Unexposed       | 13    | 920  | 1.4                    |                      |                 |                      |                 |       | 13    | 920  | 1.4       |           |                 |
| 150                                                                                | Exposed ≤ NOAEL | 16    | 656  | 2.4                    | 0.14                 |                 |                      |                 | "no"  | 7     | 369  | 1.9       | 0.53      |                 |
|                                                                                    |                 |       |      |                        |                      |                 |                      |                 | "yes" | 9     | 285  | 3.2       | 0.05      | 1.3             |
|                                                                                    | Exposed > NOAEL | 11    | 169  | 6.5                    | 0.008 **             | 4.6             | [ 2.1; 10.1 ]        | 5.1             | "no"  | 2     | 72   | 2.8       | 0.30      |                 |
|                                                                                    |                 |       |      |                        |                      |                 |                      |                 | "yes" | 9     | 95   | 9.5       | <0.001*** | 6.7             |
|                                                                                    | Total           | 40    | 1745 |                        |                      |                 |                      |                 |       | 40    | 1741 |           |           |                 |
| <b>Exposure Definition 1: "10 minutes bathing with at least 3 head immersions"</b> |                 |       |      |                        |                      |                 |                      |                 |       |       |      |           |           |                 |
| <b>Somatic coliphages/100mL by gastroenteritis definition "UK-wf"</b>              |                 |       |      |                        |                      |                 |                      |                 |       |       |      |           |           |                 |
|                                                                                    | Unexposed       | 26    | 921  | 2.8                    |                      |                 |                      |                 |       | 26    | 921  | 2.8       |           |                 |
| 10                                                                                 | Exposed ≤ NOAEL | 7     | 305  | 2.3                    | 0.62                 |                 |                      |                 | "no"  | 3     | 180  | 1.7       | 0.61      |                 |
|                                                                                    |                 |       |      |                        |                      |                 |                      |                 | "yes" | 4     | 123  | 3.3       | 0.77      | 1.6             |
|                                                                                    | Exposed > NOAEL | 37    | 530  | 7.0                    | 0.004 **             | 2.5             | [ 1.5; 4.0 ]         | 4.2             | "no"  | 15    | 267  | 5.6       | 0.03 *    |                 |
|                                                                                    |                 |       |      |                        |                      |                 |                      |                 | "yes" | 22    | 261  | 8.4       | <0.001*** | 2.8             |
|                                                                                    | Total           | 70    | 1756 |                        |                      |                 |                      |                 |       | 70    | 1752 |           |           |                 |
| <b>Exposure Definition 1: "10 minutes bathing with at least 3 head immersions"</b> |                 |       |      |                        |                      |                 |                      |                 |       |       |      |           |           |                 |
| <b>Somatic coliphages/100mL by gastroenteritis definition "NL-2"</b>               |                 |       |      |                        |                      |                 |                      |                 |       |       |      |           |           |                 |
|                                                                                    | Unexposed       | 48    | 921  | 5.2                    |                      |                 |                      |                 |       | 48    | 921  | 5.2       |           |                 |
| 10                                                                                 | Exposed ≤ NOAEL | 11    | 304  | 3.6                    | 0.26                 |                 |                      |                 | "no"  | 5     | 180  | 2.8       | 0.16      |                 |
|                                                                                    |                 |       |      |                        |                      |                 |                      |                 | "yes" | 6     | 122  | 4.9       | 0.89      | 2.1             |
|                                                                                    | Exposed > NOAEL | 49    | 530  | 9.2                    | 0.002 **             | 1.8             | [ 1.2; 2.6 ]         | 4.0             | "no"  | 22    | 267  | 8.2       | 0.06      |                 |
|                                                                                    |                 |       |      |                        |                      |                 |                      |                 | "yes" | 27    | 261  | 10.3      | 0.003 **  | 2.1             |
|                                                                                    | Total           | 108   | 1755 |                        |                      |                 |                      |                 |       | 108   | 1751 |           |           |                 |

**Wiedenmann A. et al.: Health risks from freshwater bathing**  
**Supplemental Data, Annex 8. (continued)**

| NOAEL <sup>a</sup><br>(MO/100mL)                                        | Exposure Status | Cases | n    | IR <sup>b</sup><br>(%) | p-Value <sup>c</sup> | RR <sup>d</sup> | 95% CI<br>[ LL; UL ] | aR <sup>e</sup> | "SW?" | Cases | n    | IR<br>(%) | p-Value   | aR <sup>f</sup> |
|-------------------------------------------------------------------------|-----------------|-------|------|------------------------|----------------------|-----------------|----------------------|-----------------|-------|-------|------|-----------|-----------|-----------------|
| <b>Exposure Definition 2: "Single head immersion"</b>                   |                 |       |      |                        |                      |                 |                      |                 |       |       |      |           |           |                 |
| <b><i>Escherichia coli</i>/100mL by gastroenteritis definition "UK"</b> |                 |       |      |                        |                      |                 |                      |                 |       |       |      |           |           |                 |
|                                                                         | Unexposed       | 13    | 920  | 1.4                    |                      |                 |                      |                 |       | 13    | 920  | 1.4       |           |                 |
| 1453                                                                    | Exposed ≤ NOAEL | 11    | 555  | 2.0                    | 0.40                 |                 |                      |                 | "no"  | 4     | 308  | 1.3       | 1.00      |                 |
|                                                                         |                 |       |      |                        |                      |                 |                      |                 | "yes" | 7     | 245  | 2.9       | 0.16      | 1.6             |
|                                                                         | Exposed > NOAEL | 17    | 273  | 6.2                    | 0.001 **             | 4.4             | [ 2.2; 8.7 ]         | 4.8             | "no"  | 5     | 137  | 3.6       | 0.07      |                 |
|                                                                         |                 |       |      |                        |                      |                 |                      |                 | "yes" | 12    | 134  | 9.0       | <0.001*** | 5.3             |
|                                                                         | Total           | 41    | 1748 |                        |                      |                 |                      |                 |       | 41    | 1744 |           |           |                 |

**Exposure Definition 2: "Single head immersion"**  
***Escherichia coli*/100mL by gastroenteritis definition "UK-wf"**

Not applicable. No valid NOAEL detected.

**Exposure Definition 2: "Single head immersion"**  
***Escherichia coli*/100mL by gastroenteritis definition "NL-2"**

|      |                 |     |      |      |          |     |              |     |       |     |      |      |           |     |
|------|-----------------|-----|------|------|----------|-----|--------------|-----|-------|-----|------|------|-----------|-----|
|      | Unexposed       | 48  | 921  | 5.2  |          |     |              |     |       | 48  | 921  | 5.2  |           |     |
| 2163 | Exposed ≤ NOAEL | 37  | 623  | 5.9  | 0.54     |     |              |     | "no"  | 20  | 348  | 5.7  | 0.71      |     |
|      |                 |     |      |      |          |     |              |     | "yes" | 17  | 272  | 6.3  | 0.51      | 0.5 |
|      | Exposed > NOAEL | 26  | 214  | 12.1 | 0.003 ** | 2.3 | [ 1.5; 3.7 ] | 6.9 | "no"  | 8   | 103  | 7.8  | 0.28      |     |
|      |                 |     |      |      |          |     |              |     | "yes" | 18  | 110  | 16.4 | <0.001*** | 8.6 |
|      | Total           | 111 | 1758 |      |          |     |              |     |       | 111 | 1754 |      |           |     |

**Wiedenmann A. et al.: Health risks from freshwater bathing**  
**Supplemental Data, Annex 8. (continued)**

| NOAEL <sup>a</sup><br>(MO/100mL)                                          | Exposure Status | Cases | n    | IR <sup>b</sup><br>(%) | p-Value <sup>c</sup> | RR <sup>d</sup> | 95% CI<br>[ LL; UL ] | aR <sup>e</sup> | "SW?" | Cases | n    | IR<br>(%) | p-Value   | aR <sup>f</sup> |
|---------------------------------------------------------------------------|-----------------|-------|------|------------------------|----------------------|-----------------|----------------------|-----------------|-------|-------|------|-----------|-----------|-----------------|
| <b>Exposure Definition 2: "Single head immersion"</b>                     |                 |       |      |                        |                      |                 |                      |                 |       |       |      |           |           |                 |
| <b>Intestinal enterococci/100mL by gastroenteritis definition "UK"</b>    |                 |       |      |                        |                      |                 |                      |                 |       |       |      |           |           |                 |
|                                                                           | Unexposed       | 13    | 920  | 1.4                    |                      |                 |                      |                 |       | 13    | 920  | 1.4       |           |                 |
| 123                                                                       | Exposed ≤ NOAEL | 5     | 351  | 1.4                    | 1.00                 |                 |                      |                 | "no"  | 2     | 203  | 1.0       | 1.00      |                 |
|                                                                           |                 |       |      |                        |                      |                 |                      |                 | "yes" | 3     | 146  | 2.1       | 0.47      | 1.1             |
|                                                                           | Exposed > NOAEL | 23    | 477  | 4.8                    | 0.008 **             | 3.4             | [ 1.7; 6.7 ]         | 3.4             | "no"  | 7     | 242  | 2.9       | 0.16      |                 |
|                                                                           |                 |       |      |                        |                      |                 |                      |                 | "yes" | 16    | 233  | 6.9       | <0.001*** | 4.0             |
|                                                                           | Total           | 41    | 1748 |                        |                      |                 |                      |                 |       | 41    | 1744 |           |           |                 |
| <b>Exposure Definition 2: "Single head immersion"</b>                     |                 |       |      |                        |                      |                 |                      |                 |       |       |      |           |           |                 |
| <b>Intestinal enterococci/100mL by gastroenteritis definition "UK-wf"</b> |                 |       |      |                        |                      |                 |                      |                 |       |       |      |           |           |                 |
|                                                                           | Unexposed       | 26    | 921  | 2.8                    |                      |                 |                      |                 |       | 26    | 921  | 2.8       |           |                 |
| 123                                                                       | Exposed ≤ NOAEL | 8     | 353  | 2.3                    | 0.58                 |                 |                      |                 | "no"  | 3     | 204  | 1.5       | 0.27      |                 |
|                                                                           |                 |       |      |                        |                      |                 |                      |                 | "yes" | 5     | 147  | 3.4       | 0.60      | 1.9             |
|                                                                           | Exposed > NOAEL | 38    | 485  | 7.8                    | <0.001***            | 2.8             | [ 1.7; 4.5 ]         | 5.0             | "no"  | 16    | 247  | 6.5       | 0.006 **  |                 |
|                                                                           |                 |       |      |                        |                      |                 |                      |                 | "yes" | 22    | 236  | 9.3       | <0.001*** | 2.8             |
|                                                                           | Total           | 72    | 1759 |                        |                      |                 |                      |                 |       | 72    | 1755 |           |           |                 |
| <b>Exposure Definition 2: "Single head immersion"</b>                     |                 |       |      |                        |                      |                 |                      |                 |       |       |      |           |           |                 |
| <b>Intestinal enterococci/100mL by gastroenteritis definition "NL-2"</b>  |                 |       |      |                        |                      |                 |                      |                 |       |       |      |           |           |                 |
|                                                                           | Unexposed       | 48    | 921  | 5.2                    |                      |                 |                      |                 |       | 48    | 921  | 5.2       |           |                 |
| 124                                                                       | Exposed ≤ NOAEL | 16    | 370  | 4.3                    | 0.51                 |                 |                      |                 | "no"  | 6     | 216  | 2.8       | 0.13      |                 |
|                                                                           |                 |       |      |                        |                      |                 |                      |                 | "yes" | 10    | 153  | 6.5       | 0.50      | 3.8             |
|                                                                           | Exposed > NOAEL | 47    | 467  | 10.1                   | 0.002 **             | 1.9             | [ 1.3; 2.8 ]         | 4.9             | "no"  | 22    | 235  | 9.4       | 0.02 *    |                 |
|                                                                           |                 |       |      |                        |                      |                 |                      |                 | "yes" | 25    | 229  | 10.9      | 0.002 **  | 1.6             |
|                                                                           | Total           | 111   | 1758 |                        |                      |                 |                      |                 |       | 111   | 1754 |           |           |                 |

**Wiedenmann A. et al.: Health risks from freshwater bathing**  
**Supplemental Data, Annex 8. (continued)**

| NOAEL <sup>a</sup><br>(MO/100mL)                                                  | Exposure Status | Cases | n    | IR <sup>b</sup><br>(%) | p-Value <sup>c</sup> | RR <sup>d</sup> | 95% CI<br>[ LL; UL ] | aR <sup>e</sup> | "SW?" | Cases | n    | IR<br>(%) | p-Value   | aR <sup>f</sup> |
|-----------------------------------------------------------------------------------|-----------------|-------|------|------------------------|----------------------|-----------------|----------------------|-----------------|-------|-------|------|-----------|-----------|-----------------|
| <b>Exposure Definition 2: "Single head immersion"</b>                             |                 |       |      |                        |                      |                 |                      |                 |       |       |      |           |           |                 |
| <b><i>Clostridium perfringens</i>/100mL by gastroenteritis definition "UK"</b>    |                 |       |      |                        |                      |                 |                      |                 |       |       |      |           |           |                 |
|                                                                                   | Unexposed       | 13    | 920  | 1.4                    |                      |                 |                      |                 |       | 13    | 920  | 1.4       |           |                 |
| 38                                                                                | Exposed ≤ NOAEL | 3     | 249  | 1.2                    | 1.00                 |                 |                      |                 | "no"  | 2     | 145  | 1.4       | 1.00      |                 |
|                                                                                   |                 |       |      |                        |                      |                 |                      |                 | "yes" | 1     | 104  | 1.0       | 1.00      | -0.4            |
|                                                                                   | Exposed > NOAEL | 25    | 588  | 4.3                    | 0.03 *               | 3.0             | [ 1.6; 5.8 ]         | 2.8             | "no"  | 7     | 303  | 2.3       | 0.30      |                 |
|                                                                                   |                 |       |      |                        |                      |                 |                      |                 | "yes" | 18    | 281  | 6.4       | <0.001*** | 4.1             |
|                                                                                   | Total           | 41    | 1757 |                        |                      |                 |                      |                 |       | 41    | 1753 |           |           |                 |
| <b>Exposure Definition 2: "Single head immersion"</b>                             |                 |       |      |                        |                      |                 |                      |                 |       |       |      |           |           |                 |
| <b><i>Clostridium perfringens</i>/100mL by gastroenteritis definition "UK-wf"</b> |                 |       |      |                        |                      |                 |                      |                 |       |       |      |           |           |                 |
|                                                                                   | Unexposed       | 26    | 921  | 2.8                    |                      |                 |                      |                 |       | 26    | 921  | 2.8       |           |                 |
| 38                                                                                | Exposed ≤ NOAEL | 6     | 251  | 2.4                    | 0.71                 |                 |                      |                 | "no"  | 3     | 146  | 2.1       | 0.79      |                 |
|                                                                                   |                 |       |      |                        |                      |                 |                      |                 | "yes" | 3     | 105  | 2.9       | 1.00      | 0.8             |
|                                                                                   | Exposed > NOAEL | 40    | 596  | 6.7                    | 0.01 *               | 2.4             | [ 1.5; 3.9 ]         | 3.9             | "no"  | 16    | 308  | 5.2       | 0.05 *    |                 |
|                                                                                   |                 |       |      |                        |                      |                 |                      |                 | "yes" | 24    | 284  | 8.5       | <0.001*** | 3.3             |
|                                                                                   | Total           | 72    | 1768 |                        |                      |                 |                      |                 |       | 72    | 1764 |           |           |                 |
| <b>Exposure Definition 2: "Single head immersion"</b>                             |                 |       |      |                        |                      |                 |                      |                 |       |       |      |           |           |                 |
| <b><i>Clostridium perfringens</i>/100mL by gastroenteritis definition "NL-2"</b>  |                 |       |      |                        |                      |                 |                      |                 |       |       |      |           |           |                 |
|                                                                                   | Unexposed       | 48    | 921  | 5.2                    |                      |                 |                      |                 |       | 48    | 921  | 5.2       |           |                 |
| 36                                                                                | Exposed ≤ NOAEL | 5     | 194  | 2.6                    | 0.12                 |                 |                      |                 | "no"  | 3     | 117  | 2.6       | 0.21      |                 |
|                                                                                   |                 |       |      |                        |                      |                 |                      |                 | "yes" | 2     | 77   | 2.6       | 0.42      | 0.0             |
|                                                                                   | Exposed > NOAEL | 58    | 652  | 8.9                    | 0.003 **             | 1.7             | [ 1.2; 2.5 ]         | 3.7             | "no"  | 25    | 337  | 7.4       | 0.14      |                 |
|                                                                                   |                 |       |      |                        |                      |                 |                      |                 | "yes" | 33    | 311  | 10.6      | <0.001*** | 3.2             |
|                                                                                   | Total           | 111   | 1767 |                        |                      |                 |                      |                 |       | 111   | 1763 |           |           |                 |

**Wiedenmann A. et al.: Health risks from freshwater bathing**  
**Supplemental Data, Annex 8. (continued)**

| NOAEL <sup>a</sup><br>(MO/100mL)                                      | Exposure Status | Cases | n    | IR <sup>b</sup><br>(%) | p-Value <sup>c</sup> | RR <sup>d</sup> | 95% CI<br>[ LL; UL ] | aR <sup>e</sup> | "SW?" | Cases | n    | IR<br>(%) | p-Value   | aR <sup>f</sup> |
|-----------------------------------------------------------------------|-----------------|-------|------|------------------------|----------------------|-----------------|----------------------|-----------------|-------|-------|------|-----------|-----------|-----------------|
| <b>Exposure Definition 2: "Single head immersion"</b>                 |                 |       |      |                        |                      |                 |                      |                 |       |       |      |           |           |                 |
| <b>Somatic coliphages/100mL by gastroenteritis definition "UK"</b>    |                 |       |      |                        |                      |                 |                      |                 |       |       |      |           |           |                 |
|                                                                       | Unexposed       | 13    | 920  | 1.4                    |                      |                 |                      |                 |       | 13    | 920  | 1.4       |           |                 |
| 330                                                                   | Exposed ≤ NOAEL | 9     | 487  | 1.8                    | 0.53                 |                 |                      |                 | "no"  | 4     | 299  | 1.3       | 1.00      |                 |
|                                                                       |                 |       |      |                        |                      |                 |                      |                 | "yes" | 5     | 186  | 2.7       | 0.21      | 1.4             |
|                                                                       | Exposed > NOAEL | 18    | 338  | 5.3                    | 0.006 **             | 3.8             | [ 1.9; 7.6 ]         | 3.9             | "no"  | 5     | 142  | 3.5       | 0.08      |                 |
|                                                                       |                 |       |      |                        |                      |                 |                      |                 | "yes" | 13    | 194  | 6.7       | <0.001*** | 3.2             |
|                                                                       | Total           | 40    | 1745 |                        |                      |                 |                      |                 |       | 40    | 1741 |           |           |                 |
| <b>Exposure Definition 2: "Single head immersion"</b>                 |                 |       |      |                        |                      |                 |                      |                 |       |       |      |           |           |                 |
| <b>Somatic coliphages/100mL by gastroenteritis definition "UK-wf"</b> |                 |       |      |                        |                      |                 |                      |                 |       |       |      |           |           |                 |
|                                                                       | Unexposed       | 26    | 921  | 2.8                    |                      |                 |                      |                 |       | 26    | 921  | 2.8       |           |                 |
| 50                                                                    | Exposed ≤ NOAEL | 7     | 298  | 2.3                    | 0.66                 |                 |                      |                 | "no"  | 3     | 179  | 1.7       | 0.61      |                 |
|                                                                       |                 |       |      |                        |                      |                 |                      |                 | "yes" | 4     | 118  | 3.4       | 0.77      | 1.7             |
|                                                                       | Exposed > NOAEL | 37    | 537  | 6.9                    | 0.005 **             | 2.4             | [ 1.5; 4.0 ]         | 4.1             | "no"  | 15    | 268  | 5.6       | 0.03 *    |                 |
|                                                                       |                 |       |      |                        |                      |                 |                      |                 | "yes" | 22    | 266  | 8.3       | <0.001*** | 2.7             |
|                                                                       | Total           | 70    | 1756 |                        |                      |                 |                      |                 |       | 70    | 1752 |           |           |                 |
| <b>Exposure Definition 2: "Single head immersion"</b>                 |                 |       |      |                        |                      |                 |                      |                 |       |       |      |           |           |                 |
| <b>Somatic coliphages/100mL by gastroenteritis definition "NL-2"</b>  |                 |       |      |                        |                      |                 |                      |                 |       |       |      |           |           |                 |
|                                                                       | Unexposed       | 48    | 921  | 5.2                    |                      |                 |                      |                 |       | 48    | 921  | 5.2       |           |                 |
| 119                                                                   | Exposed ≤ NOAEL | 19    | 386  | 4.9                    | 0.83                 |                 |                      |                 | "no"  | 11    | 236  | 4.7       | 0.73      |                 |
|                                                                       |                 |       |      |                        |                      |                 |                      |                 | "yes" | 8     | 149  | 5.4       | 0.94      | 0.7             |
|                                                                       | Exposed > NOAEL | 41    | 448  | 9.2                    | 0.02 *               | 1.8             | [ 1.2; 2.6 ]         | 3.9             | "no"  | 16    | 211  | 7.6       | 0.18      |                 |
|                                                                       |                 |       |      |                        |                      |                 |                      |                 | "yes" | 25    | 234  | 10.7      | 0.002 **  | 3.1             |
|                                                                       | Total           | 108   | 1755 |                        |                      |                 |                      |                 |       | 108   | 1751 |           |           |                 |



**Wiedenmann A. et al.: Health risks from freshwater bathing**  
**Supplemental Data, Annex 8.** (continued)

---

Abbreviations: NOAEL, No Observed Adverse Effect Level; MO/100mL, microorganisms per 100 mL; n, total number of participants per category; IR, incidence rate; RR, relative risk; CI, confidence interval; LL, lower limit; UL, upper limit; aR, attributable risk; "SW?", "Did you swallow water?"; UK, definition of gastroenteritis used in the United Kingdom according to Kay et al., 1994 ((diarrhea with three or more bowl movements per day) or vomiting or (nausea and fever) or (indigestion and fever)); UK-wf; UK definition without consideration of stool frequency (diarrhea or vomiting or (nausea and fever) or (indigestion and fever)); NL-2; definition of gastroenteritis used in the Netherlands according to van Asperen et al., 1998 (diarrhea or vomiting or nausea or stomach pains). <sup>a</sup> NOAELs were determined as the concentration yielding the minimal *p*-value in a series of Pearson's Chi Square tests comparing the incidence rates of disease of bathers exposed at or below a certain exposure concentration with the incidence rate of bathers exposed above this concentration for all actually occurring exposure concentrations. <sup>b</sup> Incidence rate (%) is the percentage of individuals with onset of disease within one week after exposure per category. <sup>c</sup> The *p*-value was calculated by a Pearson's chi-square test or Fisher's exact test that compared the number of cases among the bathers who were exposed in one of the given categories of fecal indicator concentrations with the number of cases among the unexposed participants (non-bathers). Fisher's exact test results were used when an expected cell value was less than five. <sup>d</sup> Relative risk is the incidence rate of disease among bathers exposed above NOAEL divided by the incidence rate of disease among non-bathers one week after exposure. <sup>e</sup> Attributable risk of bathing above NOAEL is the incidence rate of disease (in %) among bathers exposed above NOAEL minus the incidence rate of non-bathers. <sup>f</sup> Attributable risk of swallowing water below NOAEL is the incidence rate of disease among bathers exposed at or below NOAEL and reporting to have swallowed water minus the incidence rate of disease among bathers exposed at or below NOAEL and reporting not to have swallowed water. Attributable risk of swallowing water above NOAEL is the incidence rate of disease among bathers exposed above NOAEL and reporting to have swallowed water minus the incidence rate of disease among bathers exposed above NOAEL and reporting not to have swallowed water. \* *p*-Value <0.05. \*\* *p*-Value <0.01. \*\*\* *p*-Value <0.001.

**Wiedenmann A. et al.:** Health risks from freshwater bathing

**Supplemental Data, Annex 9:** Incidence rates of gastroenteritis (definition UK-wf) in quartile and quintile categories of microbial exposure concentrations for exposure definition 1 ("10 minutes bathing with at least three head immersions").

| Parameter                    | Quartile UL<br>(MO/100mL) | Cases | n   | IR <sup>a</sup><br>(%) | <i>p</i> -Value <sup>b</sup> |     | Quintile UL | Cases | n   | IR<br>(%) | <i>p</i> -Value |     |
|------------------------------|---------------------------|-------|-----|------------------------|------------------------------|-----|-------------|-------|-----|-----------|-----------------|-----|
| <b>GE definition "UK"</b>    |                           |       |     |                        |                              |     |             |       |     |           |                 |     |
| <i>Escherichia coli</i>      | Unexposed                 | 13    | 920 | 1.4                    |                              |     | unexposed   | 13    | 920 | 1.4       |                 |     |
|                              | 72                        | 2     | 205 | 1.0                    | 1.00                         |     | 61          | 1     | 164 | 0.6       | 0.71            |     |
|                              | 181                       | 6     | 209 | 2.9                    | 0.14                         |     | 116         | 5     | 167 | 3.0       | 0.18            |     |
|                              | 379                       | 8     | 207 | 3.9                    | 0.04                         | *   | 245         | 5     | 167 | 3.0       | 0.18            |     |
|                              | 4600                      | 12    | 207 | 5.8                    | <0.001                       | *** | 445         | 7     | 163 | 4.3       | 0.02            | *   |
|                              |                           |       |     |                        |                              |     | 4600        | 10    | 167 | 6.0       | 0.001           | *** |
| <b>GE definition "UK-wf"</b> |                           |       |     |                        |                              |     |             |       |     |           |                 |     |
| <i>Escherichia coli</i>      | Unexposed                 | 26    | 921 | 2.8                    |                              |     | unexposed   | 26    | 921 | 2.8       |                 |     |
|                              | 72                        | 4     | 207 | 1.9                    | 0.47                         |     | 61          | 3     | 166 | 1.8       | 0.61            |     |
|                              | 181                       | 11    | 212 | 5.2                    | 0.08                         |     | 116         | 6     | 168 | 3.6       | 0.62            |     |
|                              | 379                       | 14    | 211 | 6.6                    | 0.007                        | **  | 245         | 10    | 170 | 5.9       | 0.04            | *   |
|                              | 4600                      | 17    | 208 | 8.2                    | <0.001                       | *** | 445         | 12    | 166 | 7.2       | 0.004           | **  |
|                              |                           |       |     |                        |                              |     | 4600        | 15    | 168 | 8.9       | <0.001          | *** |
| <b>GE definition "NL-2"</b>  |                           |       |     |                        |                              |     |             |       |     |           |                 |     |
| <i>Escherichia coli</i>      | Unexposed                 | 48    | 921 | 5.2                    |                              |     | unexposed   | 48    | 921 | 5.2       |                 |     |
|                              | 72                        | 7     | 207 | 3.4                    | 0.27                         |     | 61          | 6     | 166 | 3.6       | 0.38            |     |
|                              | 181                       | 14    | 211 | 6.6                    | 0.41                         |     | 116         | 9     | 167 | 5.4       | 0.92            |     |
|                              | 379                       | 22    | 211 | 10.4                   | 0.005                        | **  | 245         | 15    | 170 | 8.8       | 0.06            |     |
|                              | 4600                      | 20    | 208 | 9.6                    | 0.02                         | *   | 445         | 16    | 166 | 9.6       | 0.03            | *   |
|                              |                           |       |     |                        |                              |     | 4600        | 17    | 168 | 10.1      | 0.01            | *   |

Wiedenmann A. et al.: Health risks from freshwater bathing

Supplemental Data, Annex 9: (continued).

| Parameter                    | Quartile UL<br>(MO/100mL) | Cases | n   | IR <sup>a</sup><br>(%) | p-Value <sup>b</sup> |     | Quintile UL | Cases | n   | IR<br>(%) | p-Value |     |
|------------------------------|---------------------------|-------|-----|------------------------|----------------------|-----|-------------|-------|-----|-----------|---------|-----|
| <b>GE definition "UK"</b>    |                           |       |     |                        |                      |     |             |       |     |           |         |     |
|                              | Unexposed                 | 13    | 920 | 1.4                    |                      |     | unexposed   | 13    | 920 | 1.4       |         |     |
| Intestinal enterococci       | 14                        | 4     | 207 | 1.9                    | 0.53                 |     | 12          | 3     | 167 | 1.8       | 0.72    |     |
|                              | 53                        | 5     | 210 | 2.4                    | 0.35                 |     | 27          | 3     | 165 | 1.8       | 0.72    |     |
|                              | 101                       | 10    | 207 | 4.8                    | 0.004                | **  | 68          | 11    | 167 | 6.6       | <0.001  | *** |
|                              | 1190                      | 9     | 204 | 4.4                    | 0.01                 | *   | 114         | 4     | 166 | 2.4       | 0.31    |     |
|                              |                           |       |     |                        |                      |     | 1190        | 7     | 163 | 4.3       | 0.02    | *   |
| <b>GE definition "UK-wf"</b> |                           |       |     |                        |                      |     |             |       |     |           |         |     |
|                              | Unexposed                 | 26    | 921 | 2.8                    |                      |     | unexposed   | 26    | 921 | 2.8       |         |     |
| Intestinal enterococci       | 14                        | 5     | 208 | 2.4                    | 0.74                 |     | 12          | 3     | 167 | 1.8       | 0.61    |     |
|                              | 53                        | 9     | 212 | 4.2                    | 0.28                 |     | 27          | 5     | 167 | 3.0       | 0.80    |     |
|                              | 101                       | 14    | 210 | 6.7                    | 0.007                | **  | 68          | 15    | 169 | 8.9       | <0.001  | *** |
|                              | 1190                      | 18    | 208 | 8.7                    | <0.001               | *** | 114         | 7     | 168 | 4.2       | 0.35    |     |
|                              |                           |       |     |                        |                      |     | 1190        | 16    | 167 | 9.6       | <0.001  | *** |
| <b>GE definition "NL-2"</b>  |                           |       |     |                        |                      |     |             |       |     |           |         |     |
|                              | Unexposed                 | 48    | 921 | 5.2                    |                      |     | unexposed   | 48    | 921 | 5.2       |         |     |
| Intestinal enterococci       | 14                        | 8     | 208 | 3.8                    | 0.41                 |     | 12          | 5     | 167 | 3.0       | 0.22    |     |
|                              | 53                        | 13    | 211 | 6.2                    | 0.58                 |     | 27          | 10    | 166 | 6.0       | 0.67    |     |
|                              | 101                       | 19    | 210 | 9.0                    | 0.03                 | *   | 68          | 18    | 169 | 10.7      | 0.006   | **  |
|                              | 1190                      | 23    | 208 | 11.1                   | 0.002                | **  | 114         | 9     | 168 | 5.4       | 0.94    |     |
|                              |                           |       |     |                        |                      |     | 1190        | 21    | 167 | 12.6      | <0.001  | *** |

Wiedenmann A. et al.: Health risks from freshwater bathing

Supplemental Data, Annex 9: (continued).

| Parameter                      | Quartile UL<br>(MO/100mL) | Cases | n   | IR <sup>a</sup><br>(%) | p-Value <sup>b</sup> |     | Quintile UL | Cases | n   | IR<br>(%) | p-Value |     |
|--------------------------------|---------------------------|-------|-----|------------------------|----------------------|-----|-------------|-------|-----|-----------|---------|-----|
| <b>GE definition "UK"</b>      |                           |       |     |                        |                      |     |             |       |     |           |         |     |
|                                | Unexposed                 | 13    | 920 | 1.4                    |                      |     | unexposed   | 13    | 920 | 1.4       |         |     |
| <i>Clostridium perfringens</i> | 9                         | 4     | 222 | 1.8                    | 0.76                 |     | 9           | 4     | 222 | 1.8       | 0.76    |     |
|                                | 18                        | 4     | 199 | 2.0                    | 0.52                 |     | 13          | 2     | 115 | 1.7       | 0.68    |     |
|                                | 33                        | 11    | 209 | 5.3                    | 0.002                | **  | 22          | 7     | 169 | 4.1       | 0.02    | *   |
|                                | 148                       | 9     | 207 | 4.3                    | 0.01                 | *   | 36          | 9     | 164 | 5.5       | 0.003   | **  |
|                                |                           |       |     |                        |                      |     | 148         | 6     | 167 | 3.6       | 0.06    |     |
| <b>GE definition "UK-wf"</b>   |                           |       |     |                        |                      |     |             |       |     |           |         |     |
|                                | Unexposed                 | 26    | 921 | 2.8                    |                      |     | unexposed   | 26    | 921 | 2.8       |         |     |
| <i>Clostridium perfringens</i> | 9                         | 6     | 224 | 2.7                    | 0.91                 |     | 9           | 6     | 224 | 2.7       | 0.91    |     |
|                                | 18                        | 9     | 202 | 4.5                    | 0.23                 |     | 13          | 4     | 115 | 3.5       | 0.57    |     |
|                                | 33                        | 18    | 211 | 8.5                    | <0.001               | *** | 22          | 12    | 172 | 7.0       | 0.006   | **  |
|                                | 148                       | 13    | 210 | 6.2                    | 0.02                 | *   | 36          | 14    | 166 | 8.4       | <0.001  | *** |
|                                |                           |       |     |                        |                      |     | 148         | 10    | 170 | 5.9       | 0.04    | *   |
| <b>GE definition "NL-2"</b>    |                           |       |     |                        |                      |     |             |       |     |           |         |     |
|                                | Unexposed                 | 48    | 921 | 5.2                    |                      |     | unexposed   | 48    | 921 | 5.2       |         |     |
| <i>Clostridium perfringens</i> | 9                         | 11    | 224 | 4.9                    | 0.85                 |     | 9           | 11    | 224 | 4.9       | 0.86    |     |
|                                | 18                        | 12    | 202 | 5.9                    | 0.68                 |     | 13          | 4     | 115 | 3.5       | 0.42    |     |
|                                | 33                        | 23    | 211 | 10.9                   | 0.002                | *   | 22          | 17    | 172 | 9.9       | 0.02    | *   |
|                                | 148                       | 17    | 209 | 8.1                    | 0.10                 |     | 36          | 19    | 165 | 11.5      | 0.002   | *   |
|                                |                           |       |     |                        |                      |     | 148         | 12    | 170 | 7.1       | 0.33    |     |

Wiedenmann A. et al.: Health risks from freshwater bathing

Supplemental Data, Annex 9: (continued).

| Parameter                    | Quartile UL<br>(MO/100mL) | Cases | n   | IR <sup>a</sup><br>(%) | p-Value <sup>b</sup> | Quintile UL | Cases | n   | IR<br>(%) | p-Value    |        |
|------------------------------|---------------------------|-------|-----|------------------------|----------------------|-------------|-------|-----|-----------|------------|--------|
| <b>GE definition "UK"</b>    |                           |       |     |                        |                      |             |       |     |           |            |        |
| Somatic coliphages           | Unexposed                 | 13    | 920 | 1.4                    |                      | unexposed   | 13    | 920 | 1.4       |            |        |
|                              | 10                        | 5     | 300 | 1.7                    | 0.78                 | 10          | 5     | 300 | 1.7       | 0.78       |        |
|                              | 35                        | 4     | 111 | 3.6                    | 0.10                 | 11          | 2     | 30  | 6.7       | 0.08       |        |
|                              | 142                       | 7     | 209 | 3.3                    | 0.08                 | 85          | 5     | 163 | 3.1       | 0.17       |        |
|                              | 3598                      | 11    | 205 | 5.4                    | 0.002                | **          | 153   | 5   | 169       | 3.0        | 0.18   |
|                              |                           |       |     |                        |                      | 3598        | 10    | 163 | 6.1       | <0.001 *** |        |
| <b>GE definition "UK-wf"</b> |                           |       |     |                        |                      |             |       |     |           |            |        |
| Somatic coliphages           | Unexposed                 | 26    | 921 | 2.8                    |                      | unexposed   | 26    | 921 | 2.8       |            |        |
|                              | 10                        | 7     | 302 | 2.3                    | 0.64                 | 10          | 7     | 302 | 2.3       | 0.64       |        |
|                              | 35                        | 9     | 115 | 7.8                    | 0.01                 | *           | 11    | 3   | 31        | 9.7        | 0.06   |
|                              | 142                       | 12    | 212 | 5.7                    | 0.04                 | *           | 85    | 11  | 167       | 6.6        | 0.01 * |
|                              | 3598                      | 16    | 206 | 7.8                    | <0.001               | ***         | 153   | 10  | 171       | 5.8        | 0.04 * |
|                              |                           |       |     |                        |                      | 3598        | 13    | 164 | 7.9       | 0.001 ***  |        |
| <b>GE definition "NL-2"</b>  |                           |       |     |                        |                      |             |       |     |           |            |        |
| Somatic coliphages           | Unexposed                 | 48    | 921 | 5.2                    |                      | unexposed   | 48    | 921 | 5.2       |            |        |
|                              | 10                        | 11    | 301 | 3.7                    | 0.27                 | 10          | 11    | 301 | 3.7       | 0.27       |        |
|                              | 35                        | 12    | 115 | 10.4                   | 0.02                 | *           | 11    | 4   | 31        | 12.9       | 0.08   |
|                              | 142                       | 17    | 212 | 8.0                    | 0.11                 |             | 85    | 14  | 167       | 8.4        | 0.10   |
|                              | 3598                      | 20    | 206 | 9.7                    | 0.01                 | *           | 153   | 15  | 171       | 8.8        | 0.07   |
|                              |                           |       |     |                        |                      | 3598        | 16    | 164 | 9.8       | 0.02 *     |        |

## Wiedenmann A. et al.: Health risks from freshwater bathing

### Supplemental Data, Annex 9: (continued).

---

Abbreviations: GE, gastroenteritis; UK-wf, definition of gastroenteritis used in the United Kingdom according to Kay et al., 1994, but without consideration of stool frequency (diarrhea or vomiting or nausea and fever or indigestion and fever); UL, Upper limit of quantile range; MO/100mL, microorganisms per 100 mL; n, total number of participants per category; IR, incidence rate. <sup>a</sup> Incidence rate (%) is the percentage of individuals with onset of disease within one week after exposure per category. <sup>b</sup> The *p*-value was calculated by a Pearson's chi-square test or Fisher's exact test that compared the number of cases among the bathers who were exposed in one of the given categories of fecal indicator concentrations with the number of cases among the unexposed participants (non-bathers). Fisher's exact test results were used when an expected cell value was less than five. \* *p*-Value <0.05. \*\* *p*-Value <0.01. \*\*\* *p*-Value <0.001.

**Wiedenmann A. et al.:** Health risks from freshwater bathing

**Supplemental Data, Annex 10:** Incidence rates of gastroenteritis (definition UK-wf) in quartile and quintile categories of microbial exposure concentrations for exposure definition 2 ("Single head immersion").

| Parameter                    | Quartile UL<br>(MO/100mL) | Cases | n   | IR <sup>a</sup><br>(%) | p-Value <sup>b</sup> |       | Quintile UL | Cases | n   | IR<br>(%) | p-Value |     |
|------------------------------|---------------------------|-------|-----|------------------------|----------------------|-------|-------------|-------|-----|-----------|---------|-----|
| <b>GE definition "UK"</b>    |                           |       |     |                        |                      |       |             |       |     |           |         |     |
| <i>Escherichia coli</i>      | Unexposed                 | 13    | 920 | 1.4                    |                      |       | unexposed   | 13    | 920 | 1.4       |         |     |
|                              | 233                       | 3     | 205 | 1.5                    | 1.00                 |       | 206         | 0     | 164 | 0.0       | 0.24    |     |
|                              | 739                       | 4     | 209 | 1.9                    | 0.54                 |       | 471         | 7     | 166 | 4.2       | 0.02    | *   |
|                              | 2204                      | 10    | 208 | 4.8                    | 0.005                | **    | 1086        | 2     | 165 | 1.2       | 1.00    |     |
|                              | 32812                     | 11    | 206 | 5.3                    | 0.002                | **    | 2749        | 12    | 167 | 7.2       | <0.001  | *** |
|                              |                           |       |     |                        |                      | 32812 | 7           | 166   | 4.2 | 0.02      | *       |     |
| <b>GE definition "UK-wf"</b> |                           |       |     |                        |                      |       |             |       |     |           |         |     |
| <i>Escherichia coli</i>      | Unexposed                 | 26    | 921 | 2.8                    |                      |       | unexposed   | 26    | 921 | 2.8       |         |     |
|                              | 233                       | 4     | 206 | 1.9                    | 0.48                 |       | 206         | 1     | 165 | 0.6       | 0.11    |     |
|                              | 739                       | 11    | 213 | 5.2                    | 0.08                 |       | 471         | 10    | 169 | 5.9       | 0.04    | *   |
|                              | 2204                      | 13    | 210 | 6.2                    | 0.02                 | *     | 1086        | 8     | 168 | 4.8       | 0.18    |     |
|                              | 32812                     | 18    | 209 | 8.6                    | <0.001               | ***   | 2749        | 16    | 169 | 9.5       | <0.001  | *** |
|                              |                           |       |     |                        |                      | 32812 | 11          | 167   | 6.6 | 0.01      | *       |     |
| <b>GE definition "NL-2"</b>  |                           |       |     |                        |                      |       |             |       |     |           |         |     |
| <i>Escherichia coli</i>      | Unexposed                 | 48    | 921 | 5.2                    |                      |       | unexposed   | 48    | 921 | 5.2       |         |     |
|                              | 233                       | 8     | 206 | 3.9                    | 0.43                 |       | 206         | 4     | 165 | 2.4       | 0.12    |     |
|                              | 739                       | 16    | 212 | 7.5                    | 0.18                 |       | 471         | 13    | 168 | 7.7       | 0.19    |     |
|                              | 2204                      | 15    | 210 | 7.1                    | 0.27                 |       | 1086        | 13    | 168 | 7.7       | 0.19    |     |
|                              | 32812                     | 24    | 209 | 11.5                   | <0.001               | ***   | 2749        | 19    | 169 | 11.2      | 0.003   | **  |
|                              |                           |       |     |                        |                      | 32812 | 14          | 167   | 8.4 | 0.10      |         |     |

**Wiedenmann A. et al.: Health risks from freshwater bathing**

**Supplemental Data, Annex 10: (continued).**

| Parameter                    | Quartile UL<br>(MO/100mL) | Cases | n   | IR <sup>a</sup><br>(%) | p-Value <sup>b</sup> |     | Quintile UL | Cases | n   | IR<br>(%) | p-Value |     |
|------------------------------|---------------------------|-------|-----|------------------------|----------------------|-----|-------------|-------|-----|-----------|---------|-----|
| <b>GE definition "UK"</b>    |                           |       |     |                        |                      |     |             |       |     |           |         |     |
|                              | Unexposed                 | 13    | 920 | 1.4                    |                      |     | unexposed   | 13    | 920 | 1.4       |         |     |
| Intestinal enterococci       | 53                        | 4     | 208 | 1.9                    | 0.53                 |     | 42          | 2     | 168 | 1.2       | 1.00    |     |
|                              | 192                       | 8     | 207 | 3.9                    | 0.04                 | *   | 112         | 3     | 164 | 1.8       | 0.72    |     |
|                              | 427                       | 7     | 209 | 3.3                    | 0.08                 |     | 256         | 9     | 167 | 5.4       | 0.003   | **  |
|                              | 11816                     | 9     | 204 | 4.4                    | 0.01                 | *   | 545         | 6     | 166 | 3.6       | 0.06    | *   |
|                              |                           |       |     |                        |                      |     | 11816       | 8     | 163 | 4.9       | 0.008   | **  |
| <b>GE definition "UK-wf"</b> |                           |       |     |                        |                      |     |             |       |     |           |         |     |
|                              | Unexposed                 | 26    | 921 | 2.8                    |                      |     | unexposed   | 26    | 921 | 2.8       |         |     |
| Intestinal enterococci       | 53                        | 4     | 208 | 1.9                    | 0.47                 |     | 42          | 2     | 168 | 1.2       | 0.29    |     |
|                              | 192                       | 12    | 210 | 5.7                    | 0.04                 | *   | 112         | 6     | 166 | 3.6       | 0.62    |     |
|                              | 427                       | 13    | 212 | 6.1                    | 0.02                 | *   | 256         | 11    | 168 | 6.5       | 0.01    | *   |
|                              | 11816                     | 17    | 208 | 8.2                    | <0.001               | *** | 545         | 12    | 170 | 7.1       | 0.006   | **  |
|                              |                           |       |     |                        |                      |     | 11816       | 15    | 166 | 9.0       | <0.001  | *** |
| <b>GE definition "NL-2"</b>  |                           |       |     |                        |                      |     |             |       |     |           |         |     |
|                              | Unexposed                 | 48    | 921 | 5.2                    |                      |     | unexposed   | 48    | 921 | 5.2       |         |     |
| Intestinal enterococci       | 53                        | 7     | 208 | 3.4                    | 0.26                 |     | 42          | 4     | 168 | 2.4       | 0.11    |     |
|                              | 192                       | 17    | 209 | 8.1                    | 0.10                 |     | 112         | 11    | 165 | 6.7       | 0.45    |     |
|                              | 427                       | 16    | 212 | 7.5                    | 0.18                 |     | 256         | 12    | 168 | 7.1       | 0.31    |     |
|                              | 11816                     | 23    | 208 | 11.1                   | 0.002                | **  | 545         | 17    | 170 | 10.0      | 0.02    | *   |
|                              |                           |       |     |                        |                      |     | 11816       | 19    | 166 | 11.4      | 0.002   | **  |



Wiedenmann A. et al.: Health risks from freshwater bathing

Supplemental Data, Annex 10: (continued).

| Parameter                      | Quartile UL<br>(MO/100mL) | Cases | n   | IR <sup>a</sup><br>(%) | p-Value <sup>b</sup> |     | Quintile UL | Cases | n   | IR<br>(%) | p-Value |     |
|--------------------------------|---------------------------|-------|-----|------------------------|----------------------|-----|-------------|-------|-----|-----------|---------|-----|
| <b>GE definition "UK"</b>      |                           |       |     |                        |                      |     |             |       |     |           |         |     |
|                                | Unexposed                 | 13    | 920 | 1.4                    |                      |     | unexposed   | 13    | 920 | 1.4       |         |     |
| <i>Clostridium perfringens</i> | 36                        | 2     | 242 | 0.8                    | 1.00                 |     | 27          | 1     | 168 | 0.6       | 0.71    |     |
|                                | 73                        | 8     | 185 | 4.3                    | 0.02                 | *   | 55          | 5     | 174 | 2.9       | 0.19    |     |
|                                | 146                       | 9     | 201 | 4.5                    | 0.009                | **  | 99          | 5     | 161 | 3.1       | 0.17    |     |
|                                | 3600                      | 9     | 209 | 4.3                    | 0.001                | **  | 175         | 10    | 168 | 6.0       | 0.001   | **  |
|                                |                           |       |     |                        |                      |     | 3600        | 7     | 166 | 4.2       | 0.02    | *   |
| <b>GE definition "UK-wf"</b>   |                           |       |     |                        |                      |     |             |       |     |           |         |     |
|                                | Unexposed                 | 26    | 921 | 2.8                    |                      |     | unexposed   | 26    | 921 | 2.8       |         |     |
| <i>Clostridium perfringens</i> | 36                        | 5     | 244 | 2.0                    | 0.50                 |     | 27          | 3     | 169 | 1.8       | 0.61    |     |
|                                | 73                        | 11    | 186 | 5.9                    | 0.03                 | *   | 55          | 9     | 176 | 5.1       | 0.11    |     |
|                                | 146                       | 17    | 205 | 8.3                    | <0.001               | *** | 99          | 7     | 162 | 4.3       | 0.32    |     |
|                                | 3600                      | 13    | 212 | 6.1                    | 0.02                 | *   | 175         | 16    | 171 | 9.4       | <0.001  | *** |
|                                |                           |       |     |                        |                      |     | 3600        | 11    | 169 | 6.5       | 0.02    | *   |
| <b>GE definition "NL-2"</b>    |                           |       |     |                        |                      |     |             |       |     |           |         |     |
|                                | Unexposed                 | 48    | 921 | 5.2                    |                      |     | unexposed   | 48    | 921 | 5.2       |         |     |
| <i>Clostridium perfringens</i> | 36                        | 10    | 244 | 4.1                    | 0.48                 |     | 27          | 5     | 169 | 3.0       | 0.21    |     |
|                                | 73                        | 15    | 186 | 8.1                    | 0.13                 |     | 55          | 15    | 176 | 8.5       | 0.08    |     |
|                                | 146                       | 22    | 205 | 10.7                   | 0.003                | **  | 99          | 8     | 162 | 4.9       | 0.88    |     |
|                                | 3600                      | 16    | 211 | 7.6                    | 0.18                 |     | 175         | 22    | 170 | 12.9      | <0.001  | *** |
|                                |                           |       |     |                        |                      |     | 3600        | 13    | 169 | 7.7       | 0.20    |     |

**Wiedenmann A. et al.: Health risks from freshwater bathing**

**Supplemental Data, Annex 10: (continued).**

| Parameter                    | Quartile UL<br>(MO/100mL) | Cases | n   | IR <sup>a</sup><br>(%) | p-Value <sup>b</sup> | Quintile UL | Cases | n   | IR<br>(%) | p-Value  |
|------------------------------|---------------------------|-------|-----|------------------------|----------------------|-------------|-------|-----|-----------|----------|
| <b>GE definition "UK"</b>    |                           |       |     |                        |                      |             |       |     |           |          |
| Somatic coliphages           | Unexposed                 | 13    | 920 | 1.4                    |                      | unexposed   | 13    | 920 | 1.4       |          |
|                              | 40                        | 5     | 252 | 2.0                    | 0.56                 | 30          | 4     | 177 | 2.3       | 0.50     |
|                              | 184                       | 4     | 159 | 2.5                    | 0.93                 | 66          | 2     | 151 | 1.3       | 1.00     |
|                              | 674                       | 8     | 206 | 3.9                    | 0.04 *               | 350         | 5     | 165 | 3.0       | 0.17     |
|                              | 28615                     | 10    | 208 | 4.8                    | 0.005 **             | 959         | 7     | 166 | 4.2       | 0.02 *   |
|                              |                           |       |     |                        |                      | 28615       | 9     | 166 | 5.4       | 0.003 ** |
| <b>GE definition "UK-wf"</b> |                           |       |     |                        |                      |             |       |     |           |          |
| Somatic coliphages           | Unexposed                 | 26    | 921 | 2.8                    |                      | unexposed   | 26    | 921 | 2.8       |          |
|                              | 40                        | 7     | 254 | 2.8                    | 0.95                 | 30          | 5     | 178 | 2.8       | 0.99     |
|                              | 184                       | 9     | 162 | 5.6                    | 0.07                 | 66          | 6     | 155 | 3.9       | 0.45     |
|                              | 674                       | 15    | 210 | 7.1                    | 0.003 *              | 350         | 10    | 167 | 6.0       | 0.04 *   |
|                              | 28615                     | 13    | 209 | 6.2                    | 0.02 *               | 959         | 11    | 168 | 6.5       | 0.01 *   |
|                              |                           |       |     |                        |                      | 28615       | 12    | 167 | 7.2       | 0.005 *  |
| <b>GE definition "NL-2"</b>  |                           |       |     |                        |                      |             |       |     |           |          |
| Somatic coliphages           | Unexposed                 | 48    | 921 | 5.2                    |                      | unexposed   | 48    | 921 | 5.2       |          |
|                              | 40                        | 12    | 254 | 4.7                    | 0.75                 | 30          | 8     | 178 | 4.5       | 0.69     |
|                              | 184                       | 11    | 161 | 6.8                    | 0.40                 | 66          | 9     | 154 | 5.8       | 0.75     |
|                              | 674                       | 20    | 210 | 9.5                    | 0.02 *               | 350         | 13    | 167 | 7.8       | 0.18     |
|                              | 28615                     | 17    | 209 | 8.1                    | 0.10                 | 959         | 15    | 168 | 8.9       | 0.06     |
|                              |                           |       |     |                        |                      | 28615       | 15    | 167 | 9.0       | 0.05     |

**Wiedenmann A. et al.:** Health risks from freshwater bathing

**Supplemental Data, Annex 10.** (continued)

---

Abbreviations: GE, gastroenteritis; UK-wf, definition of gastroenteritis used in the United Kingdom according to Kay et al., 1994, but without consideration of stool frequency (diarrhea or vomiting or nausea and fever or indigestion and fever); UL, Upper limit of quantile range; MO/100mL, microorganisms per 100 mL; n, total number of participants per category; IR, incidence rate. <sup>a</sup> Incidence rate (%) is the percentage of individuals with onset of disease within one week after exposure per category. <sup>b</sup> The *p*-value was calculated by a Pearson's chi-square test or Fisher's exact test that compared the number of cases among the bathers who were exposed in one of the given categories of fecal indicator concentrations with the number of cases among the unexposed participants (non-bathers). Fisher's exact test results were used when an expected cell value was less than five. \* *p*-Value <0.05. \*\* *p*-Value <0.01. \*\*\* *p*-Value <0.001.
